1

2 **Ontogeny of the VIP+ interneuron sensory-motor circuit prior to active**  
3 **whisking**

4

5

6 Cristiana Vagnoni, Liad J. Baruchin<sup>#</sup>, Filippo Ghezzi<sup>#</sup>, Sara Ratti<sup>#</sup>,

7 Zoltán Molnár, Simon J. B. Butt<sup>\*</sup>

8

9 Department of Physiology, Anatomy & Genetics, Sherrington Building, Parks Road,

10 Oxford, OX1 3PT, UK

11

12

13 <sup>#</sup> These authors contributed equally to the manuscript

14 <sup>\*</sup> Corresponding author: [simon.butt@dpag.ox.ac.uk](mailto:simon.butt@dpag.ox.ac.uk)

15

16

17

18

19 **ABSTRACT**

20 Development of the cortical circuits for sensory-motor processing require the  
21 coordinated integration of both columnar and long-range synaptic connections. To  
22 understand how this occurs at the level of individual neurons we have explored the  
23 timeline over which vasoactive intestinal peptide (VIP)-expressing interneurons  
24 integrate into mouse somatosensory cortex. We find a distinction in emergent long-  
25 range anterior-motor and columnar glutamatergic inputs onto layer (L)2 and L3 VIP+  
26 interneurons respectively. In parallel, VIP+ interneurons form efferent connections  
27 onto both pyramidal cells and interneurons in the immediate column in an inside-out  
28 manner. Cell-autonomous deletion of the fate-determinant transcription factor, *Prox1*,  
29 spares long-range anterior-motor inputs onto VIP+ interneurons, but leads to deficits  
30 in local connectivity. This imbalance in the somatosensory circuit results in altered  
31 spontaneous and sensory-evoked cortical activity *in vivo*. This identifies a critical role  
32 for VIP+ interneurons, and more broadly interneuron heterogeneity, in formative  
33 circuits of neocortex.

34

35

## 36 INTRODUCTION

37 The mammalian neocortex is an exquisitely assembled neural circuit for higher  
38 cognitive functions such as the detection of changes in the environment and initiation  
39 of voluntary movement. Over recent years, advances in technology have afforded us  
40 a greater understanding of how information is encoded across the different cortical  
41 areas giving rise to brain-wide information processing and behavioural output at  
42 juvenile and adult stages (Barson et al., 2020; Xiao et al., 2017). However to date  
43 developmental studies have largely focused on emergent connectivity within a given  
44 sensory area (e.g. Erzurumlu and Gaspar, 2012; Hensch, 2005) and, as a  
45 consequence, relatively little is known about how long range synaptic connections  
46 integrate with local circuits within the first few postnatal weeks (Arruda-Carvalho et  
47 al., 2017; De León Reyes et al., 2019). The need for such an understanding is  
48 evident in somatosensory barrel field (S1BF), a primary sensory neocortical area that  
49 requires processing of both motor – active exploration of the target by the vibrissae –  
50 and tactile sensory information arriving in S1BF (Petersen, 2019).

51

52 To specifically explore the emergence of long-range and local connections in S1BF  
53 development, we focused on a subtype of GABAergic interneuron defined by the  
54 expression of vasoactive intestinal peptide (VIP) (Demeulemeester et al., 1988;  
55 Hendry et al., 1984; Kawaguchi and Kubota, 1996). VIP+ interneurons (INs)  
56 represent one of the major subtypes of 5-HT<sub>3A</sub>R-expressing GABAergic interneuron  
57 (Lee et al., 2010; Rudy et al., 2011) that originate from the ventricular zone of the  
58 caudal ganglionic eminence (CGE) in the embryonic telencephalon. In line with other  
59 CGE-derived INs, VIP+ INs preferentially populate supragranular layers of neocortex  
60 within the first postnatal week (Miyoshi and Fishell, 2011) under the control of  
61 serotonin (5-HT) (Frazer et al., 2015), the transcription factor *Prox1* (Miyoshi et al.,  
62 2015), and local cues from pyramidal cells (Wester et al., 2019). Three lines of  
63 evidence suggest that VIP+ INs represent a key neuronal population that

64 orchestrates sensory-motor processing and a valid target for our investigation: first,  
65 VIP+ INs have been shown to play a key role in integrating local and long range  
66 inputs in the mature brain (Lee et al., 2013; Wall et al., 2016; Zhang et al., 2014),  
67 despite only comprising a small fraction of the total neuronal population in neocortex  
68 (Rudy et al., 2011; Xu et al., 2010). Second, VIP+ INs are thought to control  
69 information processing in cortical circuits primarily through disinhibition of another  
70 class of GABAergic interneuron defined by expression of the neuropeptide  
71 somatostatin (SST) (Lee et al., 2013; Pfeffer et al., 2013; Pi et al., 2013). SST+ INs  
72 play a prominent role in development, directing synapse formation (Oh et al., 2016),  
73 circuit maturation (Tuncdemir et al., 2016), and sensory integration (Marques-Smith  
74 et al., 2016). Third, dysfunction of VIP+ INs is found in models of  
75 neurodevelopmental psychiatric disorders pointing to an important role for this type of  
76 interneuron in early development (Batista-Brito et al., 2017; Goff and Goldberg, 2019;  
77 Mossner et al., 2020).

78

79 Our aim was to better understand the timeline over which VIP+ INs integrate into  
80 both local and long range neocortical circuits in the immediate postnatal time window,  
81 expanding on existing knowledge that has identified that CGE-derived INs can  
82 receive input from the thalamus and basal forebrain from as early as the first  
83 postnatal week (Che et al., 2018; De Marco García et al., 2015). Furthermore we  
84 wanted to understand if VIP+ INs influence transient IN circuits (Marques-Smith et  
85 al., 2016) and thereby contribute to circuit maturation, before finally probing the  
86 requirement for normal VIP+ INs synaptic integration in emergent activity in juvenile  
87 neocortex through cell autonomous deletion of *Prox1*.

88

89 We focused our investigation on emergent VIP+ IN connectivity and function in  
90 mouse whisker barrel cortex (S1BF) as we have a good understanding of key  
91 milestones in the development of this sensory modality (Erzurumlu and Gaspar,

92 2012). Moreover, the distribution of VIP+ INs across the depth of the cortex  
93 (Prönneke et al., 2015) and contribution to both columnar and cross-modal  
94 integration is well described in adult (Lee et al., 2013; Pfeffer et al., 2013; Pi et al.,  
95 2013; Wall et al., 2016; Zhang et al., 2014). Our data reveal that VIP+ INs integrate  
96 into cortical circuits as early as the layer 4 critical period for plasticity (CPP), towards  
97 the end of the first postnatal week. Moreover we observe a progressive maturation of  
98 both local and long-range afferent input prior to the onset of active perception  
99 towards the end of the second postnatal week. These observations highlight the  
100 importance of VIP+ IN pathway for the establishment of formative networks of the  
101 mammalian cerebral cortex for sensory-motor integration.

102

103

## 104 **RESULTS**

105

### 106 **Emergence of vasoactive intestinal peptide (VIP+)-expressing interneurons in** 107 **early postnatal somatosensory cortex**

108 To label VIP+ INs in neonatal whisker barrel somatosensory (S1BF) cortex, we  
109 generated *VIPCre;Ai9* (tdTomato+) offspring and confirmed co-expression of VIP and  
110 calretinin in tdTomato+ cells at postnatal day (P)21 (**Supplemental Figure 1a**). Next,  
111 we assessed the number and distribution of tdTomato+ cells across the depth of the  
112 cortex through postnatal development (P1-P21) (**Figure 1a-c and Supplemental**  
113 **Figure 1 c-d**). This revealed that the density of tdTomato+ cells in S1BF increased  
114 over the first postnatal week (**Figure 1b**), with the majority of cells located in  
115 superficial cortical layers throughout early development (**Figure 1c**). The low number  
116 of tdTomato+ cells at P3 could result from delayed migration of this CGE-derived  
117 interneuron subtype (Miyoshi and Fishell, 2011; Miyoshi et al., 2010; Taniguchi et al.,  
118 2011) or late conditional expression of the reporter allele. Nevertheless, these data  
119 confirmed that the conditional genetic strategy is effective in labelling VIP+ INs from

120 around the end of the first postnatal week onward (Prönneke et al., 2015; Taniguchi  
121 et al., 2011). As such, subsequent experiments were targeted to three experimental  
122 time windows relevant to emergent perception in S1BF: (1) the critical period of  
123 plasticity for layer (L)4 (CPP; defined as P5-P8); (2) the interval following CPP and  
124 preceding active whisking (pre-AW; P9-P11); and (3) the period following onset of  
125 active whisking (AW; P12-P16).

126

127 To further characterise the tdTomato+ population, we performed whole-cell patch  
128 clamp recordings of fluorescent L2/3 cells (n=52) in acute *in vitro* slices of S1BF to  
129 assess intrinsic electrophysiological properties as well as cell morphology. At the  
130 latest ages examined (AW), we observed heterogeneity in the intrinsic  
131 electrophysiological profiles of tdTomato+ cells consistent with previously reported  
132 continuously adapting and irregular spiking VIP+ INs (**Figure 1d,e**) (Prönneke et al.,  
133 2015, 2018). Recovered morphologies resembled bipolar and multipolar VIP+  
134 interneurons located in L2/3 (**Figure 1f**) (Prönneke et al., 2015, 2018). While passive  
135 and active intrinsic electrophysiological properties (**Figure 1g-l**) point to a  
136 progressive maturation of VIP+ INs over the time period studied (**Supplementary**  
137 **table 1**), there was some indication of increasing heterogeneity at later ages, for  
138 example increased variance in rheobase (**Figure 1i**). These data reveal that our  
139 genetic strategy can reliably identify VIP+ INs through the first postnatal weeks and  
140 hence can be used to study their emergent connectivity.

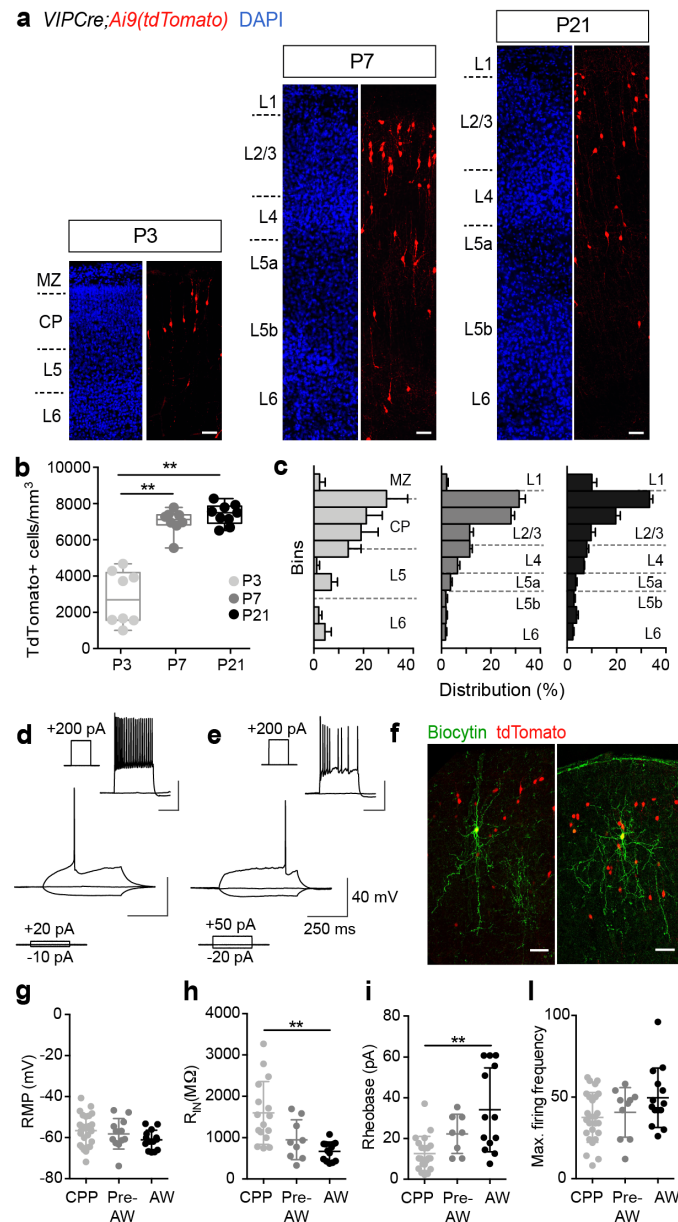

### Figure 1. Characterization of S1BF VIP+ INs throughout early postnatal development

(a) Images of S1BF from the *VIP-Cre;Ai9* line at P3, P7 and P21. Blue: DAPI, red: tdTomato. Scale bar: 50  $\mu$ m. MZ, marginal zone; CP, cortical plate; L, layer. (b) Density of tdTomato+ cells across time points. P3 and P7: 8 counts from n=3 animals; P21: 9 counts from n=3 animals. One way ANOVA:  $F(2, 22) = 55.44$ ,  $P < 0.0001$ ; *Post hoc* Tukey's multiple comparisons test P3 vs. P7:  $P \leq 0.0001^{**}$ , P3 vs. P21:  $P \leq 0.0001^{**}$ . (c) Normalized distribution of tdTomato+ cells (mean  $\pm$  SEM) across the cortical depth from the pial surface to the white matter tract at each time point (see legend in b). (d,e) Intrinsic electrophysiological profiles of two distinct VIP+ INs subtypes at AW: (d) continuous adapting and (e) irregular spiking interneurons. Superimposed traces show threshold spike, resting membrane potential and response to hyperpolarizing square pulse current injections as indicated in the bottom left corner. Inset: corresponding near maximal firing frequency responses for each subtype; scale bars consistent with the main image. (f) Morphologies of recovered VIP+ INs recorded at AW: bipolar (left) and multipolar (right) subtypes. Scale bar 50  $\mu$ m. (g-i) Passive and active intrinsic electrophysiological properties recorded in VIP+ INs through development. Horizontal line indicates the mean and error bars the standard deviation. RMP: one-way ANOVA=ns; Max firing frequency: Kruskal-Wallis (K-W) ANOVA=ns;  $R_{IN}$  and Rheobase: K-W ANOVA followed by Dunn's multiple comparisons test. **\*\***:  $P \leq 0.01$

141

142 **Glutamatergic afferent input reveals emergence of two distinct supragranular**  
143 **VIP+ IN populations through postnatal development**

144 We employed whole-cell patch-clamp electrophysiology in combination with laser  
145 scanning photostimulation (LSPS) of caged glutamate to determine the timeline for  
146 synaptic integration of L2/3 VIP+ INs into the local cortical circuit. Excitatory  
147 postsynaptic currents (EPSCs) were distinguished from direct glutamate responses  
148 based on kinetics and onset relative to the UV (355nm) laser pulse (**Figure 2a**). This  
149 analysis revealed that VIP+ INs received local L2/3 glutamatergic input at the earliest  
150 ages recorded (CPP), but as development continued, a subset of cells acquired  
151 translaminar input, primarily from L4 (**Figure 2b,c**). To characterize the observed  
152 heterogeneity in glutamatergic input through development (**Figure 2c**), we performed  
153 principal component analysis (PCA) followed by k-means cluster analysis on  
154 normalized layer inputs for the VIP+ INs across developmental stages  
155 (**Supplemental Figure 2a**). K-means analysis (**Supplemental Figure 2b,c**)  
156 identified that glutamatergic afferent input on VIP+ INs was best captured by two  
157 clusters: the first dominated by local L2/3 input (termed Local) and the second  
158 exhibiting a significant L4 (Translaminar) component (L2/3 input:  $79\pm 10\%$  for Local  
159 vs.  $49\pm 11\%$  for Translaminar cluster; L4 input:  $8\pm 5\%$  for Local vs.  $36\pm 15\%$  in  
160 Translaminar)(**Figure 2d,e**). Local VIP+ INs occupied more superficial, L2 locations  
161 compared to Translaminar cells across the time period studied (**Figure 2f**). The  
162 incidence of translaminar input increased in the Pre-AW and AW time windows  
163 (**Figure 2g**; **Supplemental Figure 2a,d**). These data show that VIP+ INs are  
164 integrated in the local L2/3 glutamatergic network from as early as the CPP. In  
165 addition our results suggest diversity in VIP+ INs based on layer location (L2 *versus*  
166 L3) as a result of emergent translaminar feed-forward excitation onto those located in  
167 L3 following the CPP.

168



169

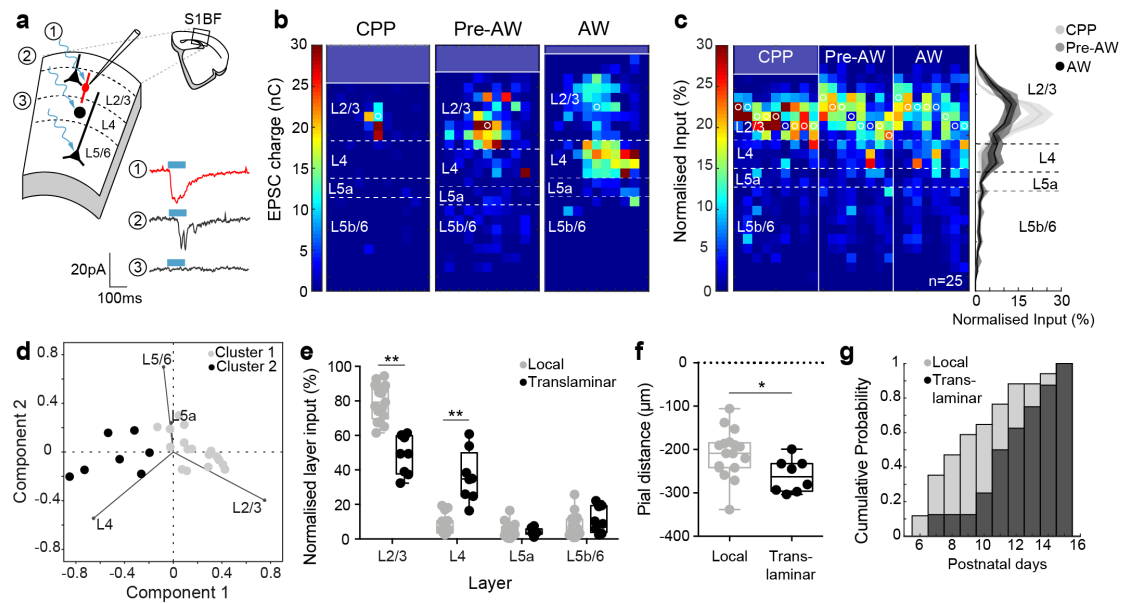

**Figure 2. LSPS uncaging of glutamate reveals the emergence of distinct local and translaminar VIP+ IN populations following the L4 critical period for plasticity (CPP)**

(a) Schematic representation of laser-scanning photostimulation combined with whole-cell patch clamp, with current traces from different positions: (1) direct glutamate response time locked to laser onset; (2) synaptic response (EPSCs) at a delay to laser firing; (3) no LSPS-evoked response. Blue bar, 100ms UV laser pulse. (b) Glutamatergic afferent input maps for 3 VIP+ INs recorded across the different time windows tested. White circles indicate location of cell soma; dashed lines indicate layer boundaries. (c) Afferent input profiles for all VIP+ INs recorded through development (n = 25 cells); profiles were aligned by the L3-L4 border and ordered by age. (c, right) Average normalized laminar profiles of glutamatergic inputs onto L2/3 VIP+ INs across development. (d) Scatter plot of the first two principal components scores following principal component analysis (PCA) of normalized glutamatergic layer input of VIP+ INs. The lines indicate different variables inserted in the analysis (i.e. the relative layer component). Clusters are indicated by different colors. (e) Normalised laminar distribution of glutamatergic inputs onto L2/3 VIP+ INs grouped by clusters shows the presence of a local and a translaminar population of L2/3 VIP+ INs. Two-way RM ANOVA followed by Sidak's multiple comparisons \*\*:P<0.0001 (f) Distance from pial surface of VIP+ INs grouped by clusters shows that translaminar cells are significantly deeper than local VIP+ INs. Two-tailed Mann Whitney test, \*:P<0.05 (g) Age analysis of VIP+ INs according to the clusters identified suggests that the translaminar cluster appears later in development.

170

171 **Long-range synaptic inputs from anterior-motor cortex onto layer 2 VIP+ INs**

172 **are present within the first postnatal week**

173 VIP+ INs are key integrators of long-range synaptic communication in the adult

174 neocortex (Lee et al., 2013; Wall et al., 2016; Zhang et al., 2014). To assess the

175 timeline over which S1BF VIP+ INs receive long-range inputs, we adapted a viral

176 strategy (Arruda-Carvalho et al., 2017) to express channelrhodopsin-2(H134R)-YFP

177 (ChR2) in anterior-motor pyramidal cells in early development (**Figure 3a**). We first  
178 confirmed that ChR2 expression was sufficient to evoke light-dependent  
179 suprathreshold responses at the onset of the CPP window in anterior-motor  
180 pyramidal cells (**Figure 3b**). In addition, we observed robust YFP expression in a  
181 distinctive pattern in S1BF with clear innervation of infragranular layers, L4 septa and  
182 L1 (**Figure 3c**) as well as dense arborization of YFP-labelled axons surrounding  
183 TdTomato+ VIP+ INs (**Figure 3d**). We recorded from both tdTomato+ VIP+ INs and  
184 non-TdTomato pyramidal cells (**Figure 3d, right**) across the depth of L2/3 in S1BF in  
185 acute *in vitro* coronal slices and tested for long-range glutamatergic synaptic input  
186 from anterior-motor areas using widefield blue (470nm) LED light pulses. S1BF  
187 neurons were identified as receiving anterior-motor synaptic input (connected) if we  
188 observed short latency EPSCs, time-locked to the LED pulse (**Figure 3e**). To exclude  
189 the possibility that an absence of such short latency EPSCs arose from a failure of  
190 our optogenetic strategy, neurons were only defined as unconnected if we observed  
191 either long latency, polysynaptic EPSCs in recorded cells or found connected cells in  
192 the same slice; both evidence of functional levels of ChR2 expression in afferent  
193 fibers in S1BF. We found that while both VIP+ INs (31%) and PYRs (62%) receive  
194 long-range inputs during CPP (**Figure 3f**), long-range connectivity onto VIP+ INs  
195 significantly increase by AW (82% of VIP+ INs), while remaining stable for PYRs. In  
196 contrast to adult cortex (Lee et al, 2013), we observed no difference in the amplitude  
197 of anterior-motor EPSCs onto VIP+ INs and PYRs during early development (**Figure**  
198 **3g**). Moreover it was apparent that during CPP, anterior-motor synaptic input formed  
199 preferentially onto superficial, presumptive L2 neurons irrespective of cell type  
200 (**Figure 3h**). This further supports segregation in the function of early L2 and L3 VIP+  
201 IN circuits, with L2 VIP+ INs integrating long-range signals while L3 VIP+ INs are  
202 progressively engaged by feed-forward excitation from the immediate column.  
203

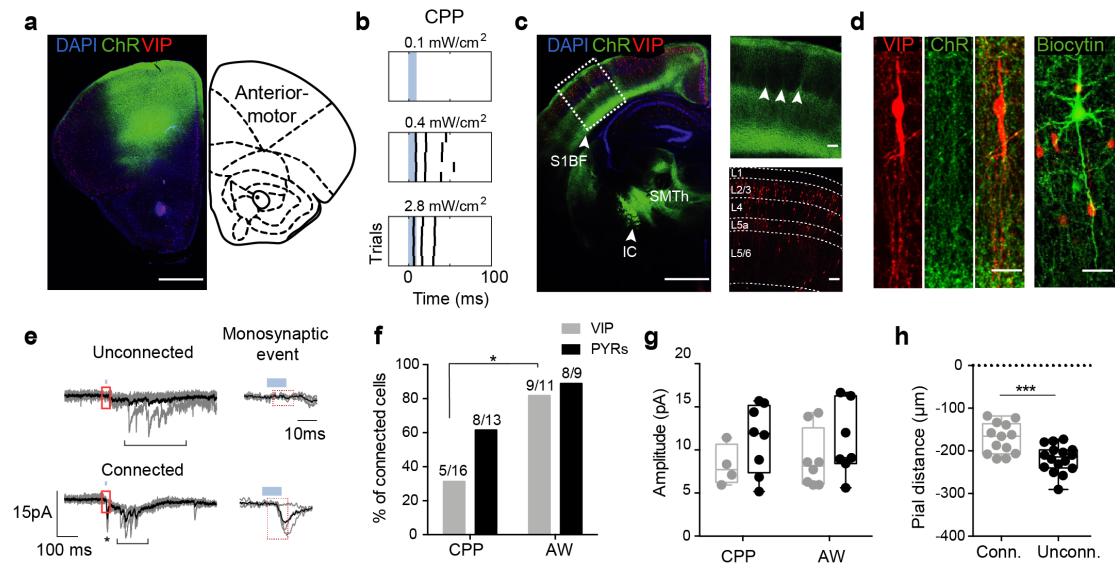

**Figure 3. Long-range synaptic inputs from anterior-motor areas onto S1BF VIP+ INs as early as CPP**

(a) Injection site during CPP, 7 days post injection; right panel adapted from Paxinos et al., (2007). Scale bar, 1mm. (b) Raster plot showing the timing of light-evoked action potentials in a ChR2+ cell (recorded in cell-attached mode) in anterior-motor areas at CPP at different LED powers. Blue bar, duration of LED pulse. (c) Recording site at CPP, 7 days post injection. Dashed box indicates area of S1BF shown at higher magnification in right panels. Arrowheads in higher magnification image indicate the fibers innervating septa between barrels. Scale bars, 1mm in the main picture and 100  $\mu$ m in the higher-magnification pictures. Dashed lines: layer boundaries. S1BF, somatosensory barrel field; SMTh, sensory-motor cortex related thalamus; IC, internal capsule. (d, left) Image of a single VIP+ IN from panel (c) surrounded by ChR2-YFP fibers. Scale bar, 25 $\mu$ m. (d, right) Recovered morphology of a L2/3 pyramidal (PYR) cells. Scale bar, 25  $\mu$ m. (e) Superimposed voltage clamped traces of unconnected and connected VIP+ INs at CPP following repeated wide-field 470nm LED stimulation. Blue bar, duration of LED pulse; asterisk, monosynaptic response; bracket, polysynaptic events. Area enclosed by the red box is shown magnified on the right: red dashed line, monosynaptic event time window. Grey, single sweep; Black, average response. (f) Proportions of S1BF VIP+ INs and pyramidal cells (PYRs) that receive monosynaptic connections from anterior-motor areas during CPP and AW time windows. Fisher's exact test, \*  $P \leq 0.05$  (g) Amplitude of minimal stimulation EPSCs in VIP+ INs and pyramidal cells. Two-way ANOVA,  $F(1, 23) = 0.1123$ ,  $P > 0.05$  (h) Analysis of distance from pial surface for connected neuron (both VIP+ INs and PYRs) during CPP, two-tailed; unpaired t test \*\*\*  $P < 0.001$ .

204

205 **VIP+ INs form synapses onto postsynaptic targets following an inside-out**  
 206 **pattern during postnatal development**

207 VIP+ INs are thought to influence cortical circuits primarily through disinhibition of  
 208 PYRs via SST+ GABAergic INs, (Lee et al., 2013; Pfeffer et al., 2013; Pi et al., 2013;  
 209 Staiger et al., 2004). To investigate the emergence of VIP+ IN output in S1BF we  
 210 crossed our *VIP-Cre* line onto a background containing the ChR2-EYFP reporter  
 211 allele (*Ai32*) (Madisen et al., 2012) and the *Lhx6-EGFP* BAC transgene that labels

212 both multipolar, putative parvalbumin-expressing (PV+) and bitufted, putative-SST+  
213 INs derived from the *Nkx2-1*-expressing medial ganglionic eminence (Gong et al.,  
214 2003) (**Figure 4a**). To confirm robust levels of ChR2 expression in VIP+ INs,  
215 sufficient for *in vitro* optogenetics, we performed extracellular recordings from EYFP+  
216 cells and established that we could evoke action potentials upon blue (470nm) light  
217 illumination from CPP onward (**Figure 4b**). We then recorded from putative  
218 postsynaptic targets of VIP+ INs across the depth of neocortex, targeting PYRs and  
219 GABAergic INs in non-*Lhx6-EGFP* and *Lhx6-EGFP+* offspring respectively.  
220 Postsynaptic neurons were voltage clamped at 0mV and the presence (connected) or  
221 absence (unconnected) of short latency, time locked inhibitory post-synaptic currents  
222 (IPSCs) from VIP+ INs established using brief pulses of wide-field blue light  
223 illumination (**Figure 4c**). We observed synaptic input from VIP+ INs onto both PYRs  
224 and *Lhx6-EGFP+* INs across development (**Figure 4d**). The incidence of VIP+ input  
225 onto PYRs increased over development, but remained constant onto *Lhx6-EGFP+*  
226 INs. However, we observed an inside-first outside-last pattern of innervation with an  
227 increased probability of connection onto infragranular as opposed to supragranular  
228 *Lhx6-EGFP+* neurons during CPP (**Figure 4e**). Although, we cannot discount  
229 innervation by the small proportion of infragranular VIP+ INs onto local *Lhx6-EGFP+*  
230 INs at this time, recovered morphologies of L2/3 VIP+ INs (**Figure 4f**) during CPP  
231 revealed prominent descending axons innervating infragranular layers from CPP  
232 onward. During AW time window, VIP+ INs showed increased connectivity onto L2/3  
233 neurons irrespective of subtype, both in terms of connection probability (**Figure 4g**)  
234 and IPSC amplitude (**Figure 4h**). These observations suggest that VIP+ INs  
235 influence infragranular GABAergic circuits during the first postnatal week at a time  
236 point when interneurons form transient translaminar connections that regulate  
237 emergent thalamocortical networks (Marques-Smith et al., 2016).

238

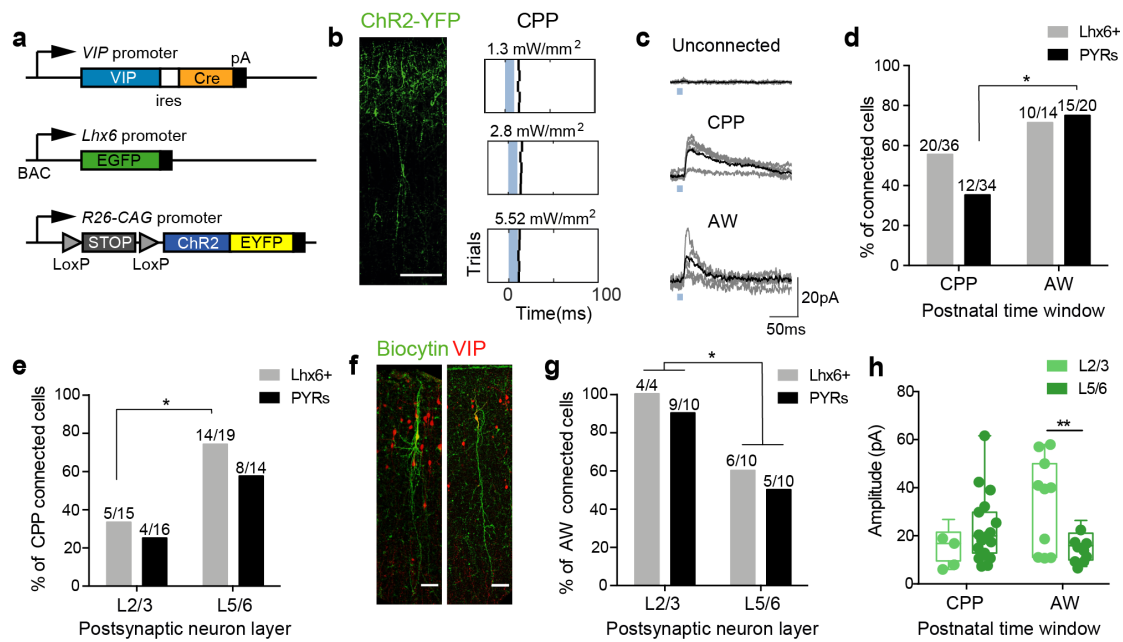

**Figure 4. VIP+ INs form synaptic connections onto *Lhx6-EGFP* INs and PYRs through early postnatal development in S1BF**

(a) Conditional genetic strategy to assess VIP+ IN connectivity over development; ires, internal ribosome entry site; pA, polyadenylation signal. R26-CAG, CMV early enhancer/chicken  $\beta$  actin promoter under the ROSA26 locus. (b) Immunohistochemistry (left) showing ChR-YFP+ cells in the *VIP-Cre;Ai32* line. Scale bar: 100 $\mu$ m. Raster plots (right) obtained from loose cell-attached recordings from a CPP VIP+ IN showing time-locked responses following stimulation at increasing LED power ( $n=5$  trials under each condition). Blue bar, duration (10ms) of LED pulse. (c) Electrophysiological current traces showing unconnected (top trace) as well as connected *Lhx6-EGFP*+ cells receiving VIP+ IN synaptic input at CPP (middle) and AW (bottom). (d) Proportion of *Lhx6-EGFP*+ and PYRs recruited during the CPP and AW time windows irrespective of layer location. Fisher's exact test with Bonferroni-Holm correction \* $P<0.05$  (e) Layer distribution of VIP+ IN input onto *Lhx6-EGFP*+ INs and PYRs during CPP. Fisher's exact test, \* $P<0.05$ . (f) Recovered morphologies of VIP+ INs recorded during CPP show axons descending into infragranular layers. (g) Proportion of *Lhx6-EGFP*+ and PYRs across layers receiving VIP+ IN synaptic input during the AW time window. Fisher's exact test, \* $P<0.05$ . (h) Amplitude of ChR-evoked VIP+ IN IPSCs across layers, irrespective of cell type, during the CPP and AW time windows. Sidak's multiple comparisons following two-way ANOVA \*\* $P<0.01$ .

239

240 **Cell-autonomous deletion of the transcription factor *Prox1* alters VIP+ IN**  
 241 **synaptic integration into local but not long-range circuits.**

242 To further understand the contribution of VIP+ INs to emergent sensory processing  
 243 we conditionally deleted the transcription factor *Prox1*, a regulator of postmitotic  
 244 maturation in CGE-derived INs (Miyoshi et al., 2015), in a cell-autonomous fashion.  
 245 Specifically, we wanted to examine if *Prox1* deletion impacted local and/or long-  
 246 range synaptic integration of VIP+ INs and determine the consequences for VIP+ INs

247 function. We bred *Vip-Cre*<sup>HOMO</sup>;*Prox1*<sup>C/+</sup> males with *Ai9*<sup>HOMO</sup>;*Prox1*<sup>C/C</sup> females to  
248 generate offspring in which VIP+ INs were *Prox1* conditional knock-out (*Prox1*<sup>C/C</sup>;  
249 cKO) and labelled with tdTomato (**Figure 5a,b**). Due to the reported effects of *Prox1*  
250 haploinsufficiency in other systems (Harvey et al., 2005) we excluded *Prox1*  
251 heterozygous (*Prox1*<sup>C/+</sup>) animal from our final analysis. As such, we assessed the  
252 distribution of VIP+ INs in cKO animals compared to wild-type (WT, **Figure 5c,d**) and  
253 observed an increase in L5b VIP+ INs at P21 following *Prox1* cell-autonomous  
254 deletion, although the broad distribution was still biased towards supragranular  
255 layers. Analysis of VIP+ IN distribution across the depth of cortex further identified a  
256 difference in skewness between WT (skewed toward L2) and cKO animals,  
257 suggesting that in the latter VIP+ INs are more broadly distributed across the depth  
258 of the cortex (**Supplemental Figure 5a**) similar to previous reports of altered  
259 migration of VIP+ INs following *Prox1* deletion (Miyoshi et al., 2015). In addition,  
260 recovered morphologies of recorded VIP+ INs from cKO animals were consistent  
261 with previous findings (Miyoshi et al., 2015) in that cells did not display characteristic  
262 bipolar morphologies (**Figure 5e**).



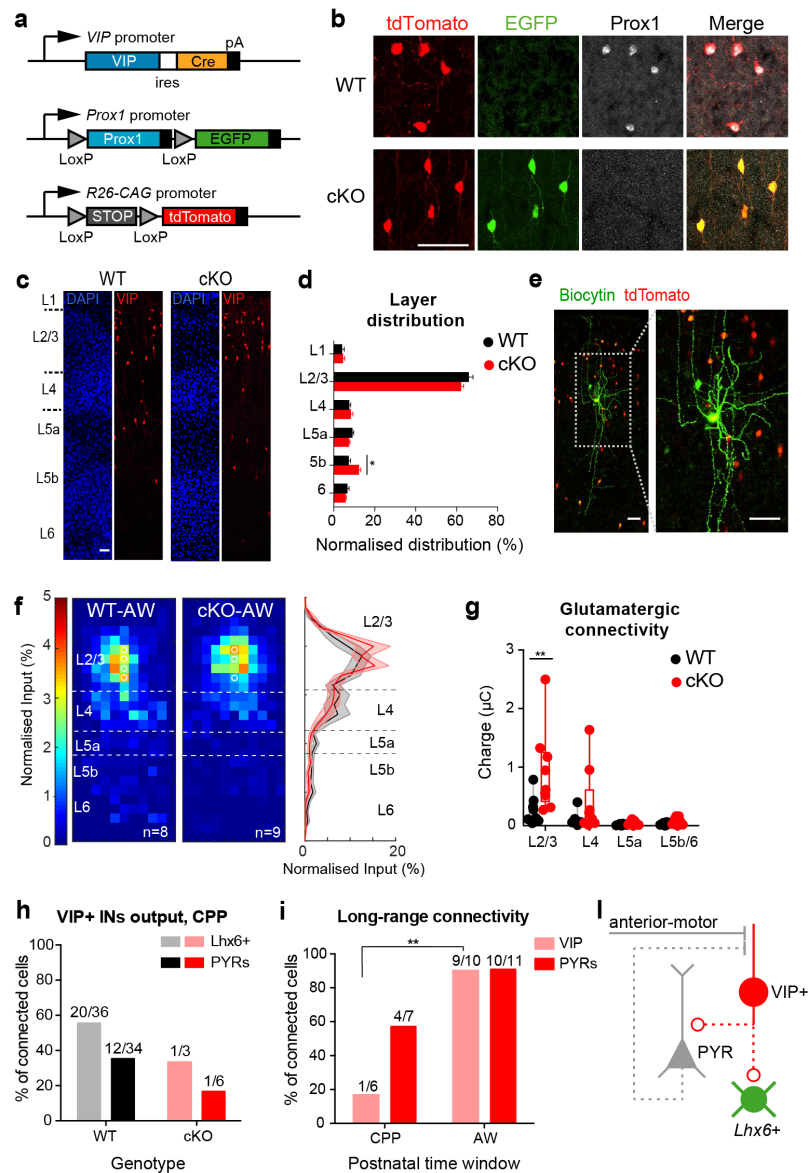

**Figure 5. Genetic impairment of VIP+ INs leads to circuit defects *in vitro***

(a) Genetic strategy employed to conditionally delete *Prox1* in VIP+ INs. (b) Immunohistochemistry showing effective deletion of *Prox1* and expression of EGFP in P21 cKO (*VIP-Cre;Ai9;Prox1<sup>C/C</sup>*) versus WT (*VIP-Cre;Ai9*). Scale bar 50µm. (c) Location of VIP+ INs (red) across the depth of cortex in wild-type (WT) and cKO animals at P21. Scale bar 50µm. (d) Layer distribution of VIP+ INs. Sidak's multiple comparisons test following two-way ANOVA \*P<0.05. Control, 9 counts, n=3 animals; cKO, 8 counts n=3 animals. (e) VIP+ IN morphologies showed kinked processes following deletion of *Prox1* as previously reported (Miyoshi et al., 2015); scale bar 50µm (f) Average normalized glutamatergic synaptic input maps onto L2/3 VIP+ INs in WT and cKO animals at AW; maps aligned on the L3-L4 border. White circles depict the location of cell bodies; dashed white lines demarcate average layer boundary. (Right panel) average normalized laminar profiles of WT and cKO cells. (g) Layer distribution of glutamatergic input for WT and cKO L2/3 VIP+ INs; Two-way ANOVA followed by Sidak's multiple comparisons test, \*\*P<0.01 (h) Percentage of *Lhx6-EGFP+* and PYR cells receiving VIP+ INs synaptic input during CPP in WT and cKO animals (i) Percentage of VIP+ INs receiving monosynaptic connections from anterior-motor areas in cKO animals. Fisher's Exact Test \*\*P<0.01 (j) Altered (dashed line) and normal (solid line) synaptic connections in the cKO VIP+ IN circuit. Flat line endings, glutamatergic synapses; circle endings; GABAergic synapses.

264 To examine the impact of *Prox1* deletion on local synaptic integration of VIP+ INs, we  
265 performed LSPS glutamate uncaging to determine PYR afferent input onto VIP+ INs  
266 in cKO versus WT. At CPP and pre-AW time points we observed mainly local  
267 glutamatergic inputs in cells recorded from cKO animals (**Supplementary Figure 5b**)  
268 similar to the majority of WT VIP+ cells at the same ages (**Figure 2**). However,  
269 during AW, the normalised input maps and layer input profile (**Figure 5f**) revealed a  
270 shift toward local L2/3 input in cKO animals. Analysis of average charge per layer  
271 confirmed an increase in local input from L2/3 PYRs onto VIP+ INs in cKO versus  
272 WT animals (**Figure 5g**). These data point to a disruption in the synaptic integration  
273 within the local network of cKO VIP+ INs in early development. To assess if this  
274 extended to efferent targets of VIP+ INs, we then crossed our conditional *Prox1* allele  
275 onto the *Ai32;Lhx6-EGFP* background and tested for the presence of ChR2-evoked  
276 IPSCs in both *Lhx6-EGFP+* INs and PYRs. We found reduced connectivity onto both  
277 populations as early as CPP (**Figure 5h**) highlighting further deficits in local synaptic  
278 integration as a result of *Prox1* deletion. In contrast, long-range input from anterior-  
279 motor areas – assessed using viral transduction of anterior-motor pyramidal cells  
280 with ChR2 – revealed a similar timeline in emergent connectivity (**Figure 5i**)  
281 compared to WT (**Figure 3**) with VIP+ INs progressively recruited across the first two  
282 postnatal weeks. Taken together, these findings support previous observations that  
283 cell autonomous deletion of *Prox1* alters the synaptic integration of VIP+ INs (Miyoshi  
284 et al., 2015). They further identify subtle alterations in local connectivity within the  
285 immediate column without discernible impact on long-range connections (**Figure 5l**).  
286  
287



288 **Consequences of altered VIP+ IN synaptic integration on emergent S1BF**  
289 **function *in vivo***

290 VIP+ INs play important roles in sensory perception in S1BF (Barson et al., 2020;  
291 Lee et al., 2013; Sachidhanandam et al., 2016; Yu et al., 2019). To understand the  
292 long-lasting consequences of our genetic perturbation of VIP+ INs, we performed *in*  
293 *vivo* extracellular recordings in S1BF of anaesthetised juvenile (P21) animals to  
294 ascertain the impact of *Prox1* deletion on spontaneous activity (baseline) and multi-  
295 whisker evoked sensory activity. Placement of electrodes in S1BF was confirmed by  
296 short latency local field potential (LFP) deflections in response to multi-whisker  
297 stimulation and *post hoc* recovery of Dil track through the whisker barrel field (**Figure**  
298 **6a**). We observed an increase in both the spontaneous multi-unit activity (MUA)  
299 across all layers of neocortex (**Figure 6b,c**) as well as in the power density of slow  
300 waves (0.5 - 2Hz) (**Figure 6d**) in cKO as opposed to WT animals.

301

302 Multi-whisker stimulation in both WT and cKO animals resulted in characteristic sink-  
303 source pattern of recruitment across the layers of S1BF (**Figure 6e**) and prominent  
304 short latency MUA in L4 and L5/6 of WT animals (**Figure 6f**). In contrast to the  
305 increased spontaneous activity in cKO mice, whisker stimulation resulted in a  
306 decrease in peak MUA firing rate in cKO as opposed to WT animals (**Figure 6f**) with  
307 an overall effect observed across all layers due to genotype (**Figure 6g**). We  
308 conclude that deletion of *Prox1* in VIP+ INs results in contrasting effects on  
309 spontaneous and sensory-evoked *in vivo* activity (**Figure 6h**).

310

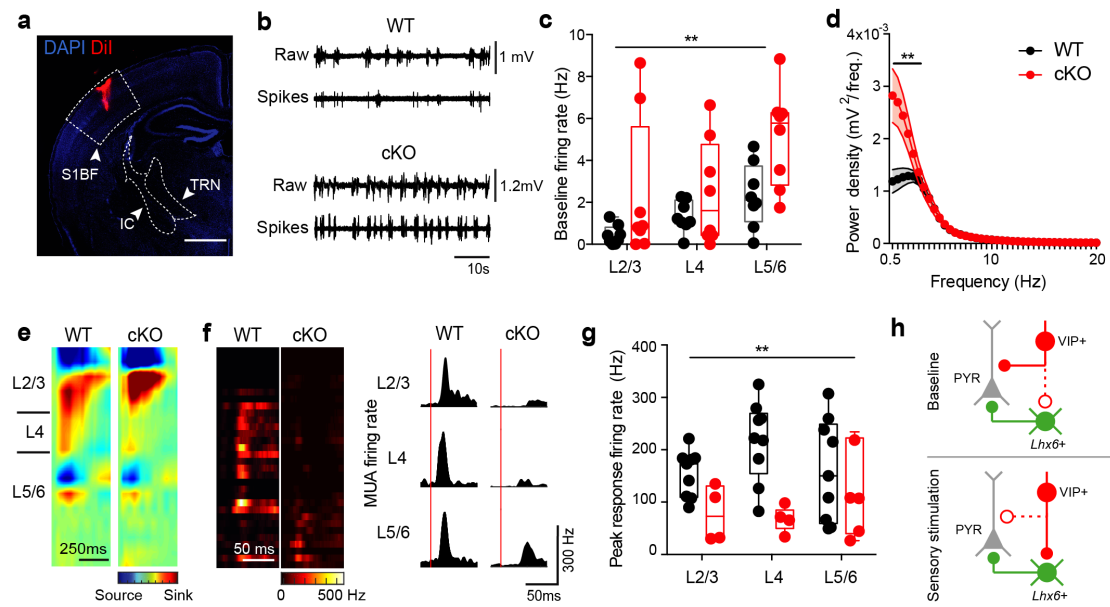

**Figure 6. Conditional deletion of *Prox1* in VIP+ INs leads to altered network activity *in vivo***

(a) *Post hoc* histological analysis to confirm electrode position following extracellular recording; scale bar 1mm. TRN, thalamic reticular nucleus; IC, internal capsule. (b) Local field potential (LFP) traces and multi-unit activity (MUA) during baseline activity in WT and cKO animals. (c) Average spontaneous MUA frequency across the depth of the cortex in WT and cKO animals; Two-way ANOVA,  $F(1, 42) = 10.62$ ,  $**P < 0.01$  (d) LFP power analysis in WT and cKO reveals genotype-dependent differences across the 0.5 - 2Hz frequency bands; Two-way RM ANOVA,  $F(39, 702) = 6.895$ ,  $**P < 0.0001$  (e) Current-source density (CSD) maps for WT and cKO across layers following whisker stimulation. The CSD plot is visualized as a pseudo-color image with red representing sinks and blue indicating sources. (f) (left) MUA heat maps following multi-whisker stimulation for WT and cKO. (Right) layer-specific multi unit activity following multi-whisker stimulation (onset indicated by the red bar). (g) Average peak multi-unit activity (MUA) upon multi-whisker stimulation across the depth of the cortex in WT and cKO animals; Two-way ANOVA,  $F(1, 36) = 13.99$ ,  $**P < 0.001$ . (h) Model of the action of VIP+ INs in anaesthetised animals during baseline and sensory stimulation. Solid line, active synaptic pathway; dashed line, quiescent connection.

311

312

## 313 **DISCUSSION**

314

315 We have used optical strategies in combination with electrophysiology to define  
316 postnatal synaptic integration and function of VIP+ INs in mouse somatosensory  
317 cortex. We found that VIP+ INs integrate into local and anterior-motor circuits as  
318 early as the L4 critical period of plasticity (P5-8). These data identify an early role for  
319 this interneuron population that suggests that they contribute to early cortical circuit  
320 maturation and plasticity. Perturbation of the genetic specification of VIP+ INs  
321 through conditional deletion of the transcription factor *Prox1* impairs local circuit  
322 integration and somatosensory processing.

323

324 VIP+ INs are a major class of GABAergic interneuron that originate from the caudal  
325 ganglionic eminence (CGE). CGE INs, defined by expression of the ionotropic 5-HT<sub>3A</sub>  
326 receptor as well as the transcription factor *Prox1* (Lee et al., 2010; Miyoshi et al.,  
327 2015; Rubin and Kessaris, 2013), have a late birthdate compared to the other two  
328 major classes of GABAergic IN – PV+ and SST+ INs – that originate from the medial  
329 ganglionic eminence (MGE) (Butt et al., 2005; Miyoshi and Fishell, 2011; Miyoshi et  
330 al., 2010). As such, CGE INs are regarded as late integrators into the cortical circuitry  
331 that preferentially populate supragranular layers of neocortex, modulate other INs –  
332 notably SST+ cells – and play a role in mediating top down influences (Fu et al.,  
333 2014; Karnani et al., 2016; Lee et al., 2013; Pfeffer et al., 2013; Pi et al., 2013;  
334 Prönneke et al., 2015; Wall et al., 2016; Zhang et al., 2014). However our data  
335 identify a more complex picture, with VIP+ INs influencing infragranular MGE-derived  
336 INs and pyramidal cells within the first postnatal week in S1BF; a time point when  
337 VIP+ INs have not fully integrated into either the local, columnar or long-range  
338 glutamatergic network. Following the layer 4 critical period for plasticity (CPP; P5-  
339 P8), we observe the emergence of translaminal glutamatergic connections on  
340 supragranular VIP+ INs as well as concurrent increase in synaptic input from

341 anterior-motor areas, such that the mature VIP+ IN circuit is largely in place by the  
342 onset of active perception and exploratory behaviour around P12 (Arakawa and  
343 Erzurumlu, 2015). Our data suggest that a distinction can be made between L2 and  
344 L3 VIP+ INs at early ages, with the latter receiving emergent feed-forward excitation  
345 from L4 and the former recipient of anterior-motor input at early ages. Cell  
346 autonomous deletion of the transcription factor *Prox1* in VIP+ INs results in altered  
347 migration and synaptic integration into the immediate column but spares long-range  
348 connectivity. These impairments at the network level underlie an increase in  
349 spontaneous *in vivo* network activity with a parallel increase in slow-wave power  
350 density band (0.5-2Hz) present under urethane anaesthesia (Clement et al., 2008). In  
351 contrast, whisker-evoked activity is attenuated across the depth of cortex that could  
352 arise from reduced VIP+ IN disinhibition of pyramidal cell following conditional  
353 deletion of *Prox1*. This broad effect across the layers of neocortex is at odds with  
354 previous work, that has identified layer-specific VIP+ IN disinhibition in S1BF (Muñoz  
355 et al., 2017) but further supports the idea that *Prox1* is necessary to establish such  
356 layer-specific VIP+ IN networks (Miyoshi et al., 2015). In addition our *in vivo*  
357 observations match those of others which have reported differing effects on  
358 spontaneous and sensory evoked activity (Batista-Brito et al., 2017; Mossner et al.,  
359 2020).

360

361 Coordinated activity between motor and sensory areas starts early in development  
362 (An et al., 2014; Luhmann, 2017; McVea et al., 2012, 2017), prior to the onset of  
363 active whisking at the end of the second postnatal week (Arakawa and Erzurumlu,  
364 2015; Bureau et al., 2004). We have used a viral optogenetic strategy, previously  
365 employed to delineate the emergence of prefrontal cortex-amygdala connectivity  
366 (Arruda-Carvalho et al., 2017), to show that long-range connections from anterior-  
367 motor areas engage not only with pyramidal cells in S1BF, but also VIP+ INs (Lee et  
368 al., 2013; Wall et al., 2016) as early as the CPP. This extends our knowledge of how

369 brain-wide circuits come online (Arruda-Carvalho et al., 2017; De León Reyes et al.,  
370 2019) and identifies the recruitment of GABAergic interneurons during circuit  
371 plasticity and maturation across brain areas. The relative balance between long-  
372 range and local influences remains to be investigated but our data argues for an  
373 initial compartmentalization of these two influences prior to the potentiation of feed-  
374 forward and local synapses in supragranular layers at the onset of active perception  
375 (Bureau et al., 2004; Clem and Barth, 2006; Clem et al., 2008; Itami and Kimura,  
376 2012; Wen and Barth, 2011).

377

378 To assess the efferent targets of VIP+ INs through development we used a  
379 conditional optogenetic strategy and recorded from candidate postsynaptic neurons  
380 (Garcia-Junco-Clemente et al., 2017; Lee et al., 2013; Pi et al., 2013) including MGE-  
381 derived INs identified using the Lhx6-EGFP transgenic line. We observed that VIP+  
382 INs form functional synapses onto postsynaptic neurons in an inside-out manner and  
383 target infragranular pyramidal cells and Lhx6-EGFP INs from the CPP onward –  
384 including SST+ interneurons that we and others have shown to be important for  
385 circuit maturation (Marques-Smith et al., 2016; Tuncdemir et al., 2016). Indeed, it is  
386 evident that the pattern of VIP+ IN innervation of post-synaptic targets shifts with the  
387 progressive inside-out maturation of the cortical circuitry in line with the emergence of  
388 the canonical cortical circuit (Bureau et al., 2004; Erzurumlu and Gaspar, 2012;  
389 Marques-Smith et al., 2016; Wen and Barth, 2011). Such that during the latest time  
390 window we studied, AW, VIP+ IN innervation of postsynaptic neurons matches the  
391 pattern observed in adult cortex (Muñoz et al., 2017; Zhou et al., 2017; Feldmeyer et  
392 al., 2018). While we cannot discriminate the specific subtype of the postsynaptic  
393 MGE interneurons that receive VIP+ IN input, these likely include both PV+ and  
394 SST+ INs as previously reported (Dávid et al., 2007; Hioki et al., 2013; Lee et al.,  
395 2013; Pfeffer et al., 2013; Pi et al., 2013; Staiger et al., 2004; Zhang et al., 2014), and  
396 early SST+ IN networks important for circuit maturation (Marques-Smith et al., 2016;

397 Tuncdemir et al., 2016). This further suggests that VIP+ INs are capable of  
398 disinhibition – a proven mechanism for synaptic plasticity (Fu et al., 2015; Letzkus et  
399 al., 2015; Pi et al., 2013; Williams and Holtmaat, 2019) from the CPP onward.  
400 Moreover our mapping of the efferent targets of VIP+ IN reinforce the body of  
401 evidence showing that this class of neuron target pyramidal cells directly (Chiu et al.,  
402 2018; Garcia-Junco-Clemente et al., 2017; Lee et al., 2013; Pfeffer et al., 2013) and  
403 do so from an early age. As such VIP+ INs are, from the moment that they integrate  
404 into neocortex, well positioned to exert varied effects as described in the juvenile and  
405 adult cortex (Batista-Brito et al., 2017; Bigelow et al., 2019; Cardin, 2019; Dipoppa et  
406 al., 2018; Fu et al., 2014; Garrett et al., 2020; Keller et al., 2020; Millman et al., 2019;  
407 Pakan et al., 2016; Pi et al., 2013).

408

409 We tested the requirement for VIP INs using a genetic strategy – conditional loss of  
410 function of the transcription factor *Prox1*, that has previously been shown to alter the  
411 migration and synaptic integration of CGE-derived, 5-HT<sub>3A</sub>R+ INs (Miyoshi et al.,  
412 2015). Our results point to subtle deficits in the layer location and synaptic integration  
413 of VIP+ INs within the local S1BF circuit following cell autonomous deletion of *Prox1*  
414 in VIP+ INs; deficits that have consequences for sensory processing in the juvenile  
415 mouse. The selective impact on local connections points to a failure of VIP+ INs to  
416 appropriately interpret normal columnar signals for synaptic integration (Miyoshi et  
417 al., 2015; Wester et al., 2019) following deletion of this transcription factor. Altered  
418 molecular machinery could include members of the neurexin - neuroligin synaptic  
419 organizer protein family that are selectively expressed by *Prox1*+ INs (Lukacsovich et  
420 al., 2019), and have the ability to differentially regulate local versus long-range  
421 glutamatergic connections (Pregno et al., 2013). That aside, deletion of *Prox1* in VIP  
422 INs results in attenuation of multi-whisker evoked activity across the depth of cortex,  
423 pointing to impairment in the processing of incoming sensory information (Barson et  
424 al., 2020; Lee et al., 2013; Sachidhanandam et al., 2016; Yu et al., 2019).

425

426 Taken together, our observations align with a number of recent reports suggesting  
427 that genetic perturbation of VIP+ INs early in development can have significant  
428 effects on cortical processing (Batista-Brito et al., 2017; Goff and Goldberg, 2019;  
429 Mossner et al., 2020; Qiu et al., 2020). We propose that VIP+ INs represent a core  
430 component of early GABAergic networks in S1BF, one that is able to integrate  
431 sensory and motor information within the first postnatal week. We identify that  
432 through these synaptic connections, and interactions with ascending pathways  
433 including thalamic input (Che et al., 2018) and neuromodulatory systems (De Marco  
434 García et al., 2015; Frazer et al., 2015; Lee et al., 2010; Murthy et al., 2014), VIP+  
435 INs are well positioned to influence the plasticity and maturation of both GABAergic  
436 and glutamatergic cortical networks from the first postnatal week onward.

437

## 438 METHODS

439

### 440 Animal husbandry and use

441 The following mouse lines were maintained on a mixed C57BL/6J and CD1  
442 background: *VIP-ires-Cre* (*Vip*<sup>tm1(cre)Zjh1</sup>/J) (Taniguchi et al., 2011); *Lhx6-EGFP*  
443 (Tg(Lhx6-EGFP)BP221Gsat) (Gong et al., 2003); *Ai9* (B6.Cg-*Gt(ROSA)26Sor*<sup>tm9(CAG-</sup>  
444 *tdTomato)Hze*/J) (The Jackson Laboratory); *Ai32* (B6;129S-*Gt(ROSA)26Sor*<sup>tm32(CAG-</sup>  
445 *COP4\*H134R/EYFP)Hze*/J) (The Jackson Laboratory); *Prox1* (*Prox1*<sup>tm1.1Fuma</sup>) (Iwano et al.,  
446 2012). Conditional *Prox1* mice generated by Prof. Fumio Matsuzaki (RIKEN Centre  
447 for Developmental Biology, Minatojima Minamimachi Chuo-ku Kobe Japan) were  
448 provided by Prof. Paul Riley (Oxford, UK). Animals were kept with the dam until  
449 weaning on a 12 h light/dark cycle with food and water provided *ad libitum*.  
450 Experimental animals were heterozygous for *VIP-Cre* and the reporter (either *Ai32* or  
451 *Ai9*), and, when applicable, hemizygous for *Lhx6-EGFP*. Conditional *Prox1* animals  
452 were homozygous for the *Prox1* floxed allele. *VIP-Cre;Ai9*, *VIP-Cre;Ai32;Lhx6-EGFP*,  
453 *VIP-Cre;Ai9;Prox1*<sup>C/C</sup> neonates were obtained from appropriate breeding pairs and  
454 used for experiments between postnatal day 0 and 22 (P0 and P22). Animal use was  
455 approved by the local ethical review panel and conducted according to the Home  
456 Office project (30/3052 and P861F9BB75) and personal licenses under the UK  
457 Animals (Scientific Procedure) 1986 Act.

458

### 459 Genotyping

460 All experiments involving the *Prox1* line (*Prox1*<sup>tm1.1Fuma</sup>) (Iwano et al., 2012) were  
461 performed blind to the genotype, which was confirmed by PCR following completion  
462 of data analysis. The following primers were used: Forward: CAG CCC TTT TGT  
463 TCT GTT GGC CAG ; Reverse: GCA GAT GCT GTC CCT ACC GTC C. PCR was  
464 performed as follows: after 2 min of denaturation at 94 °C, 35 amplification cycles  
465 were performed (94 °C for 30 s, 60 °C for 30 s, 72 °C for 45 s), followed by a final



466 extension stage at 72 °C for 5min. PCR products were kept at 4°C and then run on a  
467 1.5% agarose gel in TAE (Tris-acetate-EDTA) buffer (Sigma, UK) with the conditional  
468 allele showing a larger band (220bp) versus wild-type (WT) (184bp)(Iwano et al.,  
469 2012).

470

#### 471 **Immunohistochemistry**

472 Following anaesthesia induction with 4% isoflurane in 100% O<sub>2</sub>, pups of both sexes  
473 were euthanized with an overdose (>200mg/kg) of 20% pentobarbital sodium  
474 solution and transcardially perfused with 4% paraformaldehyde (PFA, Alfa Aesar) in  
475 phosphate-buffered solution (PBS, Sigma). Brains were dissected out, post-fixed in  
476 4% PFA in PBS for 1 hour at 4°C, washed in PBS and stored in PBS-Azide (0.02-  
477 0.05%) at 4°C until use. Brains were then prepared for vibratome or cryostat cutting.  
478 In the case of the former (e.g. tdTomato, GFP, and calretinin staining), brains were  
479 embedded in a 5% low-gelling agarose gel (in PBS) and 50µm coronal slices were  
480 cut using a vibroslicer (Leica VT1000S). Slices were then stored in PBS-Azide (0.02-  
481 0.05%) at 4°C. Alternatively (e.g. VIP and Prox1 staining), brains were cryoprotected  
482 using increasing concentrations of sucrose (10% and then 30%) in PBS at 4°C  
483 overnight. Brains were then embedded in O.C.T. compound (VWR) on dry ice and  
484 kept at -80°C until they were sectioned on a cryostat (Leica Biosystems) into 20 -  
485 25µm serial coronal sections and mounted on SuperFrost Plus slides (VWR). Before  
486 immunohistochemistry, slices were washed in PBS at room temperature (RT) then  
487 permeabilized with PBS-T (0.1M PBS + 0.2% Triton-X100, Sigma) for 30 mins. prior  
488 to blocking with 5% normal goat serum (NGS, Invitrogen) in PBS-T for 1-2 hrs. at RT,  
489 and incubation with the primary antibody (polyclonal rabbit anti-dsRed antibody,  
490 632496, Clontech, dilution 1:500; monoclonal mouse anti-dsRed antibody, 3994-100,  
491 BioVision, dilution 1:500; polyclonal chicken anti-GFP, ab13970, Abcam, dilution  
492 1:2000; mouse monoclonal anti-Calretinin clone 6B8.2, MAB1568, Sigma-Aldrich,  
493 dilution 1:100; polyclonal rabbit anti-VIP, ab8556, Abcam, dilution 1:2000) in the

494 blocking solution overnight at 4°C. For VIP staining, the primary antibody was kept  
495 for 2 nights at 4°C. After being washed in PBS and left additional 30 minutes in the  
496 blocking solution at RT, slices were incubated with a 1:500-1000 dilution of  
497 secondary antibody (goat anti-rabbit IgG (H+L) Alexa546 conjugate, A-11035,  
498 Molecular Probes; goat anti-chicken Alexa488 conjugate, ab150169, Abcam; goat  
499 anti-mouse IgG (H+L) Alexa568 conjugate, ab175473, Abcam; goat anti-rabbit  
500 Alexa633, A-21070, Molecular Probes) for 2 hours at RT. After 3x5 min washes in  
501 PBS, sections were counterstained with 4',6'-diamidino-2'-phenylindole  
502 dihydrochloride (DAPI, D3571, Molecular Probes, dilution 1:1000), re-washed,  
503 mounted when appropriate and cover-slipped with Fluoromount aqueous mounting  
504 medium (Sigma). Finally, they were permanently sealed using nail polish.

505 For *Prox1* staining, slices were permeabilised with PBS-T (0.1M PBS + 0.1% Triton-  
506 X100, Sigma) for 30 minutes and blocked with 10% normal goat serum (NGS,  
507 Invitrogen) in PBS-T for 1-2 hours at RT. Tissue was then incubated with the primary  
508 antibody (polyclonal rabbit anti-PROX1, AB5475, Sigma-Aldrich, dilution 1:250) in  
509 blocking solution overnight at 4°C. Following washing, the slices were incubated for 2  
510 hours at RT with anti-rabbit biotinylated antibody (1:200) in blocking solution. After  
511 3x10 minute washings, slices were incubated for 2 hours at RT with streptavidin  
512 Alexa488 conjugate (S11223, Molecular Probes, dilution 1:500). Washings, DAPI  
513 counterstaining and mounting were performed as previously described.

514

### 515 **Image acquisition and analysis**

516 Microscopy imaging for cell counting was performed with a Zeiss laser scanning  
517 confocal microscope (LSM710), using a UPLS APO (air) 10x/0.40 objective at a pixel  
518 resolution of 1024 x 1024. Anatomically matched sections of the somatosensory  
519 barrel cortex were selected for cell counting, using the Atlas of the Developing Mouse  
520 Brain (Paxinos et al., 2007). For each image, cells were counted across all layers in  
521 regions of interest (ROI) of fixed width (either 500 or 1000 µm).

522 Imaging of Prox1 staining was obtained using an Olympus point-scanning confocal  
523 (FV3000), equipped with a UPLS APO (air) 20x/0.75 objective, at a pixel resolution of  
524 1024 x 1024. For quantification of tdTomato+ cells, a customised macro developed in  
525 Fiji (Schindelin et al., 2012) was used. Briefly, the boundaries of the different cortical  
526 layers were determined by DAPI counterstaining. TdTomato signal was then used to  
527 automatically build a binary mask identifying only somata. To normalize the  
528 distribution of positive cells, each selected column was divided into 10 equal bins.  
529 Based on their centroid location, somata were then assigned to layers and bins.  
530 To quantify cell density, a similar strategy to the one reported by Prönneke et al.  
531 (2015) was followed. The area of the cortical depth in which cells were counted was  
532 measured ( $\mu\text{m}^2$ ) and multiplied by the thickness of the section, to obtain a volume  
533 value in  $\mu\text{m}^3$  which was then converted to a  $\text{mm}^3$  value.

534

### 535 **Viral injections**

536 To ensure early channelrhodopsin-2 expression, the AAV1.CaMKIIa.hChR2(H134R)-  
537 eYFP.WPRE.hGH virus (Penn Vector Core, Addgene 269696P, Lot CS1322, titre  
538  $3.388 \times 10^{13}$  GC/ml, suspended in PBS with 5% glycerol (Arruda-Carvalho et al., 2017))  
539 was used. P0-P1 pups were separated from the dam, anesthetized through  
540 hypothermia for 5-8 min, and moved to a customised stereotaxic set-up. A small  
541 volume of virus (49.9nL x 3 cycles; rate: 0.23 nL/s; delay: 3 s) was injected with the  
542 Nanoject III (Programmable Nanoliter Injector, Drummond) using a pulled glass  
543 pipette (~ 20  $\mu\text{m}$  inner tip diameter, bevelled at a 45° angle). To ensure targeting of  
544 the developing anterior-motor areas, the following coordinates were used (calculated  
545 from vascular lambda and expressed as mm): AP -3.12; ML 1.1; DV 0.8. No incisions  
546 were made, but once reached the right AP and ML positions, the pipette tip was used  
547 to pierce through the skull and then positioned in the correct DV coordinates to  
548 perform the injection. The pipette was withdrawn ~10-30 seconds after completion of  
549 injection. After 6-7 days post-injection (dpi) it was possible to observe good viral

550 transduction of cell bodies in anterior-motor areas, as well as fibers present in S1BF.  
551 To confirm targeting of anterior-motor areas, perfused brains were sectioned into  
552 50µm coronal slices on a vibrating microtome (Leica, VT1000S).  
553 Immunohistochemistry was performed using polyclonal chicken anti-GFP antibody  
554 (ab13970, Abcam, dilution 1:2000) and polyclonal rabbit anti-dsRed (632496,  
555 Clontech, dilution 1:500). Fluorescent images were acquired with a Zeiss 800  
556 Airyscan using a 10x 0.45NA Plan-APOCHROMAT (Zeiss) objective.

557

### 558 ***In vitro* electrophysiology**

559 Acute in vitro brain slices was prepared as previously described (Anastasiades et al.,  
560 2016; Marques-Smith et al., 2016). Mice of both sexes were used. Slices containing  
561 the somatosensory whisker barrel cortex (S1BF) were selected for electrophysiology  
562 experiments. Neurons ~50µm below the slice surface were targeted for whole-cell  
563 patch-clamp recordings at RT using a MultiClamp 700B amplifier and a Digidata  
564 1440A digitiser (Molecular Devices, USA). A standard potassium-based intracellular  
565 electrode solution of the following composition (in mM): 128 K- gluconate, 4 NaCl, 0.3  
566 Li-GTP, 5 Mg-ATP, 0.1 CaCl<sub>2</sub>, 10 HEPES and 1 glucose (pH 7.2 with KOH; 270-280  
567 mOsm) was used to obtain intrinsic electrophysiological properties, as well as  
568 mapping of local and long-range glutamatergic inputs. To record GABAergic IPSCs,  
569 electrodes were filled with a Cesium-based intracellular solution, containing (in mM):  
570 100 gluconic acid, 0.2 EGTA, 5 MgCl<sub>2</sub>, 40 HEPES, 2 Mg-ATP, 0.3 Li-GTP (pH 7.2  
571 using CsOH; 270-280 mOsm). Intracellular solutions contained biocytin (3%) (Sigma  
572 UK) to enable recovery of the morphology of recorded cells. Glutamatergic EPSCs  
573 were recorded with the neuron voltage clamped at -60mV (Anastasiades and Butt,  
574 2012). GABAergic IPSCs were recorded in cells voltage clamped at the reversal  
575 potential for glutamate (E<sub>glut</sub>), set to 0 mV (corrected for calculated liquid junction  
576 potential) (Anastasiades and Butt, 2012; Anastasiades et al., 2016). Cortical layers  
577 were distinguished in the DIC image based on changes in cell size and density. Cell

578 input and series resistance were monitored during the recordings without applying  
579 compensation; recordings were discarded when series resistance exceeded 20% of  
580 its initial value. Intrinsic electrophysiological properties were recorded in current  
581 clamp mode in response to depolarising or hyperpolarising current pulses of 500ms  
582 delivered at 0.5Hz via Clampex (v.10.1, Molecular Devices). Data was analyzed  
583 offline using a Matlab custom-written script.

584

### 585 **Laser scanning photostimulation (LSPS)**

586 LSPS protocols were performed as previously described (Anastasiades and Butt,  
587 2012; Anastasiades et al., 2016; Marques-Smith et al., 2016). Stimulation was  
588 performed using a low intensity (max. 2mW), long duration (100ms) laser pulse  
589 generated by an ultraviolet (UV) laser (DPSL-355/30) together with a UGA-42  
590 targeting module (Rapp OptoElectronic GmbH) and focused through Zeiss Axioskop  
591 FS2-plus microscope equipped with a 10X UPLFLN objective (Olympus). Laser  
592 power was calibrated to the developmental age to ensure spatial resolution ~50µm  
593 (Anastasiades and Butt, 2012; Anastasiades et al., 2016; Marques-Smith et al.,  
594 2016). Prior to LSPS, slices were incubated for at least 6 mins. with high divalent  
595 cation (HDC) ACSF (ACSF with 4mM MgCl<sub>2</sub> and 4mM CaCl<sub>2</sub>, to reduce all  
596 polysynaptic and spontaneous activity), containing 100µM of 4-Methoxy-7-  
597 nitroindolinyI-caged-L-glutamate (MNI glutamate, Tocris Bioscience).

598 Photostimulation was triggered in a pseudorandom pattern to prevent sequential  
599 stimulation of adjacent sites at 1Hz (Anastasiades and Butt, 2012; Shepherd et al.,  
600 2003) and the position of the target grid adjusted to cover the entire depth of the  
601 cortex. LSPS grids at each locations were run multiple times, aiming to obtain a  
602 minimum of two-three repeat runs per cell. An IR-DIC photomicrograph of the LSPS  
603 grid relative to the patched cell was taken and used as a reference to reconstruct the  
604 pixel positions relative to the layer boundaries. Offline analysis of the current traces  
605 was performed adapting a customised Matlab script developed in the lab

606 (Matlab2018a). Previously published criteria (Anastasiades and Butt, 2012) were  
607 used to determine the putative monosynaptic event detection window. The total  
608 charge was extracted for events captured within the monosynaptic window. Events  
609 with onsets before the monosynaptic window were considered to contain a direct-  
610 response component. In this case, the charge value was interpolated from all the  
611 other surrounding points using the Matlab function 'griddata' with linear interpolation  
612 (Weiler et al., 2018). This reduced overestimation of local connectivity caused by  
613 partially including the direct response. For each cell, the absolute (pC/pixel) and  
614 normalised (%pC/pixel) afferent input was measured. In normalised maps, each pixel  
615 indicates the amplitude of the average evoked EPSCs expressed as a percentage of  
616 the overall input evoked across the extent of the LSPS grid. Laminar input profiles  
617 were evaluated by summing each normalized input evoked from each horizontal row.  
618 Average maps were plotted aligning individual maps to the L3-L4 border.

619

#### 620 **Cluster analysis of LSPS data**

621 Principal component analysis (PCA) was performed on the normalised afferent input  
622 per layer obtained for each cell. Following identification of the first two principal  
623 components, cluster analysis was performed employing k-means clustering, using  
624 squared Euclidean distance as the metric and a maximum number of 1000 iterations.  
625 To determine the optimal number of clusters, silhouette analysis was performed.

626

#### 627 **Optogenetic stimulation of VIP+ INs output**

628 Activation of VIP+ INs in the *VIP-Cre;Ai32* line was achieved by wide-field blue light  
629 stimulation (Cool-LED pE-100, 470nm) focused through a 40x objective (Olympus  
630 LUMPLFLN 40XW Objective). 10ms square light pulses were delivered at multiple  
631 LED power intensity (0.082, 0.38, 0.7, 1.33, 2.83 and 5.52 mW/cm<sup>2</sup>). In each  
632 recording, stimulations were repeated five times every 20 seconds. Post-synaptic  
633 cells were considered responsive only if light-evoked, time-locked IPSCs were

634 present in at least 2 out of 5 trials. The minimal stimulation, defined as the minimal  
635 LED power able to elicit at least 2 IPSCs in 5 trials, was calculated for each cell. A  
636 customised Matlab script (Matlab2018a) was used to extract percentage of failure  
637 and average response amplitude.

638

### 639 **Optogenetic stimulation of anterior-motor afferents in S1BF**

640 Activation of virally expressed channelrhodopsin either in the soma of anterior-motor  
641 pyramidal cells or in their terminals in S1BF was achieved as outlined above. In this  
642 case, 1ms and 10 ms blue light pulses were delivered at different LED intensities to  
643 ensure to find the minimal stimulation required to engage postsynaptic cells. To  
644 confirm the monosynaptic nature of the responses and calculate the monosynaptic  
645 window, tetrodotoxin (TTX, 1  $\mu$ M) and 4-aminopyridine (4-AP, 100  $\mu$ M) were added to  
646 the bath solution in a subset of cells (Petreanu et al., 2009; Suter and Shepherd,  
647 2015; Yamawaki and Shepherd, 2015). Whenever EPSCs were not detected in L2/3  
648 neurons, the presence of functional ChR2+ terminals was confirmed by recording a  
649 L6 pyramidal cell, an internal positive control as demonstrated by the abundant  
650 presence of ChR2+ fibers in L6. Data analysis was performed as described above.

651

### 652 ***In vivo* electrophysiology**

653 Mice of both sexes aged P19-P22 were anaesthetised with 10% urethane in PBS  
654 (dose: 1 – 1.5g/kg) (Sigma). Mice were mounted in a stereotaxic frame (Kopf, with  
655 Stoelting pup adaptor) and the scalp removed to expose the skull. The following  
656 coordinates were used for S1BF, with lambda used as reference: AP 3.30 mm, ML  
657 3.125 mm, DV -750  $\mu$ m. A craniotomy of ~2mm in diameter was obtained with a drill  
658 (Volvere i7, NSK Gx35EM-B OBJ30013 and NSK VR-RB OBJ10007) equipped with  
659 a 0.5 mm tip. A 32-channel single shank electrode (A1x32-Poly2-5mm-50s-177,  
660 Neuronexus) was slowly lowered into the brain. To ensure *post-hoc* confirmation of  
661 the electrode location, it was submerged in Dil (DilC18(3), 2.5 mg/ml, D282 Lot



662 1990320 in 70% ethanol, Sigma) for 10-20 minutes before insertion. During the entire  
663 duration of the experiments, depth of anaesthesia and breathing were constantly  
664 monitored. The animal temperature was maintained with a heating pad (Watlow  
665 025037500, 120 Volts, 46 Watts, 1JR 1529C-14) set at 37 °C.

666

667 A 20 min baseline was recorded a few minutes after electrode insertion (Open Ephys  
668 acquisition board). A piezo stimulator (PB4NB2W Piezoelectric Bimorph Bending  
669 Actuator with Wires, Thorlabs) was used to perform the whisker pad stimulation  
670 protocol (1s stimulation at 3600 deg/s with 20s inter-stimulus interval, for a total of  
671 40-50 trials). To allow simultaneous stimulation of all the contralateral whiskers, they  
672 were glued together using a small amount of super-glue (Loctite), before placing the  
673 animal in the stereotaxic frame. This stimulation protocol was chosen to mimic  
674 natural, rhythmic patterns of whisker activity (Cao et al., 2012; Mégevand et al.,  
675 2009).

676

### 677 **Analysis of *in vivo* data**

678 The cortical depth of each recording was evaluated using current-source density  
679 (CSD) maps, calculated as the second spatial derivative of the local field potential  
680 (LFP) averaged across all the trials. The shortest latency CSD sink evoked upon  
681 sensory stimulation was used to define the granular layer. Channels above and  
682 below that were assigned to supragranular and infragranular layers respectively. LFP  
683 traces were filtered with a 500 Hz low pass filter. Recordings with more than 50% of  
684 the power in the noise frequency (~50Hz) were excluded from further analysis. To  
685 analyze spontaneous activity, LFP power spectra were computed using a fast Fourier  
686 transform focusing on frequencies up to 20Hz.

687

688 Prior to analysis, recordings were spike sorted with Kilosort (Pachitariu et al., 2016)  
689 and inspected in Phy (Rossant et al., 2016) to detect multi-unit activity (MUA).



690 Spontaneous MUA activity was evaluated by measuring the average spike rate within  
691 each layer during a 20-minute baseline period. To analyze whisker-evoked MUA,  
692 spike rate was averaged across trials. MUAs identified within the same layer were  
693 then averaged together. The peak response was identified within a 50ms window  
694 after the first whisker deflection as a response 3 times bigger than the standard  
695 deviation of the baseline activity (evaluated as the mean activity 50ms before  
696 stimulation). Whisker- evoked firing rate was evaluated as the difference between  
697 firing rate at baseline and maximal firing rate after stimulation of all the layer-  
698 averaged MUAs.

699

#### 700 **Statistical Analysis**

701 All results in the text are expressed as mean  $\pm$  standard deviation of the mean; n  
702 indicates the number of cells recorded in each independent experiment, unless  
703 otherwise stated. In the boxplots, circles represent single data points, horizontal line  
704 the median of the data, the box borders indicate the 25th and 75th percentiles and  
705 error bars the spread of the data. Microsoft Excel (2010, Microsoft, UK) was used for  
706 data organization, while statistical analysis was performed with GraphPad Prism  
707 version 6.0 (GraphPad) and with Matlab 2018a (Mathworks). Fisher's exact test was  
708 used to compare synaptic connection incidence. Continuous data were assessed for  
709 normality with the D'Agostino- Pearson normality test and for equal variance, in order  
710 to apply the appropriate parametric (ANOVAs, t-test) and non-parametric tests  
711 (Kruskal–Wallis ANOVAs, Mann–Whitney U test). Statistical significance was  
712 evaluated at  $p \leq 0.05$ . Further details of the analysis can be found in the  
713 Supplementary Table 2 – Statistics.

714

715

716

717

718 **AUTHORS CONTRIBUTION**

719 CV and SJBB designed the research and wrote the manuscript. CV, LJB, FG and SR  
720 conducted experiments and analyzed the data. ZM provided mentorship and  
721 supervision to CV and access to histological equipment. All authors edited the  
722 manuscript.

723

724 **ACKNOWLEDGEMENTS**

725 Research in the Butt lab was funded by the BBSRC (BB/P003796/1). CV was funded  
726 by the Clarendon Fund and Christ Church College Joint Award in conjunction with a  
727 Schorstein Research Fellowship and the Medical Research Council Fellowship. SR  
728 was part funded by a small Research Grant from Keble College awarded to SB. FG  
729 was funded by a Wellcome Trust DPhil scholarship (215199/Z/19/Z).

730 We would like to thank Prof. Fumio Matsuzaki (RIKEN Center for Biosystems  
731 Dynamics Research, Kobe, Japan) for his generous gift of the conditional *Prox1*  
732 mouse line; Prof. Arruda-Carvalho (Department of Psychology, Toronto, Canada) for  
733 sharing her experience with early postnatal viral injections; Drs Michael Kohl and Ana  
734 Bottura de Barros (Oxford, UK) for their help and training in postnatal injections; and  
735 the Micron Advanced Bioimaging Unit (supported by Wellcome Strategic Awards  
736 091911/B/10/Z and 107457/Z/15/Z) for their assistance in this work. We would also  
737 like to thank Drs. Adam Packer and Armin Lak for providing feedback on an earlier  
738 version of the manuscript.

739

740 **SUPPLEMENTARY MATERIAL**

741

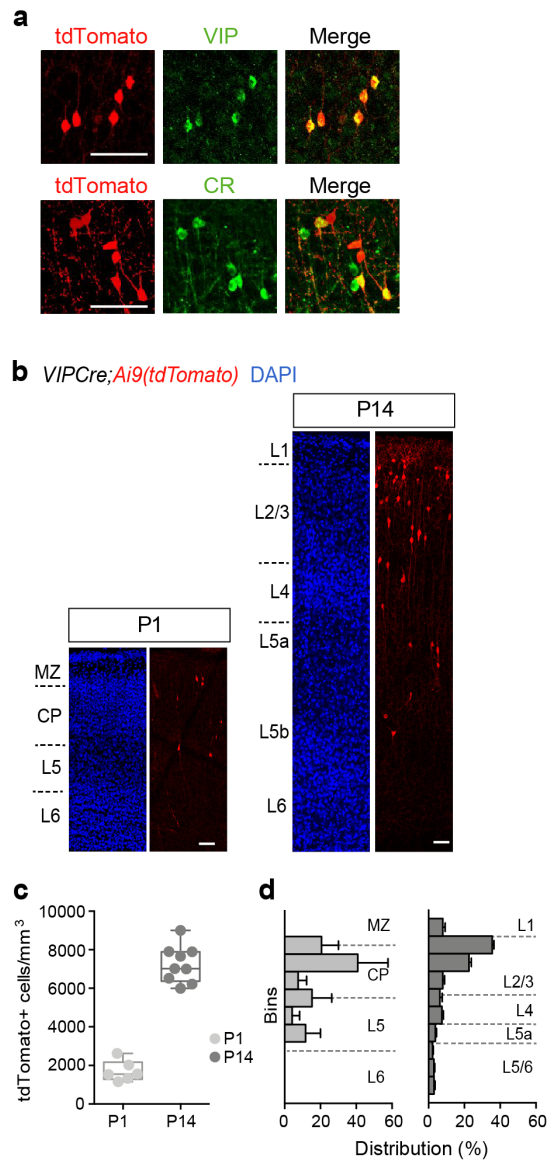

**Supplementary Figure 1. Additional characterization of VIP+ INs in early postnatal S1BF**

(a) Images of *VIP-Cre;Ai9* P21 cortex demonstrating co-expression of tdTomato with VIP (top row) and calretinin (bottom); scale bar, 50 $\mu$ m. (b) Images across the depth of cortex in *VIP-Cre;Ai9* mice at postnatal days (P)1 and P14. Scale bar 50 $\mu$ m. MZ, marginal zone; CP, cortical plate. (c) Density of tdTomato+ cells at P1 and P14. (d) Normalized distribution of tdTomato+ cells across the depth of cortex at these two time points. Bars represent the mean  $\pm$ SEM.

742

743

744

| Age           | Membrane constant (tau) (ms) | Spike          |                              |             |                 |                       |                    |                | Adaptation in firing frequency (%) |
|---------------|------------------------------|----------------|------------------------------|-------------|-----------------|-----------------------|--------------------|----------------|------------------------------------|
|               |                              | Threshold (mV) | Spike delay at Rheobase (ms) | Height (mV) | Half width (ms) | 10-90% rise time (ms) | AHP Amplitude (mV) | AHP delay (ms) |                                    |
| CPP (n=26)    | 74±17                        | -32±7          | 174±89                       | 45±8        | 2.8±0.9         | 1.1±0.3               | 18±5               | 23±10          | 27±25                              |
| pre-AW (n=12) | 52±26                        | -34±4          | 198±131                      | 57±14       | 2.1±0.7         | 0.8±0.3               | 17±4               | 19±10          | 27±26                              |
| AW (n=14)     | 41±18                        | -35±3          | 239±151                      | 54±13       | 1.7±0.5         | 0.6±0.2               | 12±5               | 13±12          | 51±17                              |

\* vs CPP  
 \*\* vs CPP  
 \*\*\* vs CPP  
 \*\*\*\* vs CPP

**Supplementary Table 1. Intrinsic electrophysiological properties of VIP+ INs across early postnatal development.**

All data is reported as mean ± SD. 10-90% rise time, time from the 10% to the 90% of the action potential height; AHP, after hyperpolarization. Multiple comparisons corrected results following one-way ANOVA or Kruskal Wallis one-way ANOVA are color-coded according to the legend. .\*=P<0.05; \*\*=P<0.01; \*\*\*<0.001; \*\*\*\*=P<0.0001

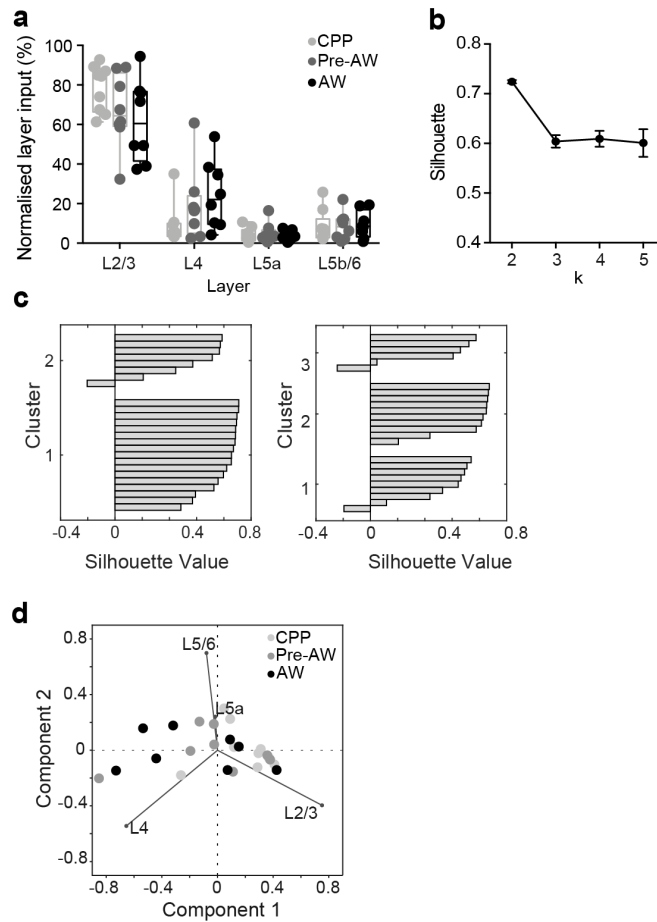

### Supplementary Figure 2. Analysis of LSPS glutamatergic input profiles for VIP+ INs

(a) Percentage of glutamatergic input from each layer onto L2/3 VIP+ INs across postnatal development. (b) Average silhouette values following k-means analysis (1000 repetition per number of clusters) for 2 to 5 clusters (k); k=2 is the optimal number of clusters for classifying glutamatergic afferent input profiles onto VIP+ INs across the time window studied. (c) Silhouette analysis on k-means clustering from k=2 and k=3. (d) Scatter plot of the first two principal components scores following principal component analysis (PCA) of normalized glutamatergic layer input of VIP+ INs. Developmental time points are indicated by different colors.

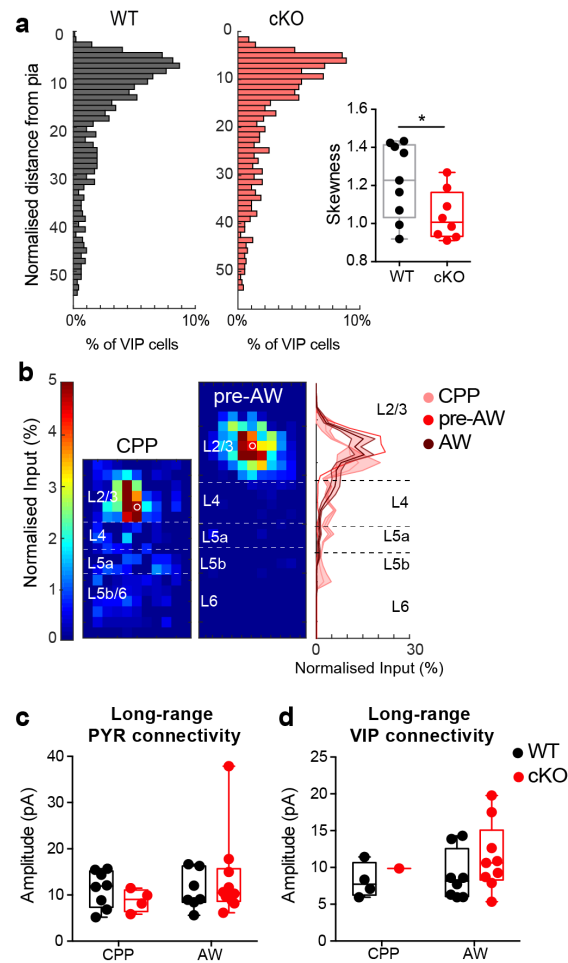

### Supplementary Figure 5. Impact of cell autonomous deletion of *Prox1* on VIP+ interneurons

(a) Distribution of VIP+ INs across S1BF in WT and cKO animals. (Right) Bar plot of skewness (i.e. measure of asymmetry) of the distribution of VIP+ cells in WT vs cKO S1BF. WT: 9 counts from n=3 animals; cKO: 8 counts from n=3 animals. Two tailed, unpaired t test with equal SD \*  $P \leq 0.05$ . (b)(left) LSPS maps showing normalised glutamatergic input onto L2/3 cKO VIP+ INs cells recorded prior to AW. (right panel) Layer profile of cKO cells across the three developmental time windows. (c,d) No differences were found in amplitude of long-range inputs from anterior-motor areas onto PYR (c) and VIP+ INs (d) between WT and cKO at any time point.

747

748

749 **REFERENCES**

- 750 An, S., Kilb, W., and Luhmann, H.J. (2014). Sensory-Evoked and Spontaneous  
751 Gamma and Spindle Bursts in Neonatal Rat Motor Cortex. *J. Neurosci.* **34**,  
752 10870–10883.
- 753 Anastasiades, P.G., and Butt, S.J.B. (2012). A Role for Silent Synapses in the  
754 Development of the Pathway from Layer 2/3 to 5 Pyramidal Cells in the  
755 Neocortex. *J. Neurosci.* **32**, 13085–13099.
- 756 Anastasiades, P.G., Marques-Smith, A., Lyngholm, D., Lickiss, T., Raffiq, S., Kätzel,  
757 D., Miesenböck, G., and Butt, S.J.B. (2016). GABAergic interneurons form  
758 transient layer-specific circuits in early postnatal neocortex. *Nat. Commun.* **7**,  
759 10584.
- 760 Arakawa, H., and Erzurumlu, R.S. (2015). Role of whiskers in sensorimotor  
761 development of C57BL/6 mice. *Behav. Brain Res.* **287**, 146–155.
- 762 Arruda-Carvalho, M., Wu, W.-C., Cummings, K.A., and Clem, R.L. (2017).  
763 Optogenetic Examination of Prefrontal-Amygdala Synaptic Development. *J.*  
764 *Neurosci.* **37**, 2976–2985.
- 765 Barson, D., Hamodi, A.S., Shen, X., Lur, G., Constable, R.T., Cardin, J.A., Crair,  
766 M.C., and Higley, M.J. (2020). Simultaneous mesoscopic and two-photon  
767 imaging of neuronal activity in cortical circuits. *Nat. Methods* **17**, 107–113.
- 768 Batista-Brito, R., Vinck, M., Ferguson, K.A., Chang, J.T., Laubender, D., Lur, G.,  
769 Mossner, J.M., Hernandez, V.G., Ramakrishnan, C., Deisseroth, K., et al.  
770 (2017). Developmental Dysfunction of VIP Interneurons Impairs Cortical  
771 Circuits. *Neuron* **95**, 884-895.e9.
- 772 Bigelow, J., Morrill, R.J., Dekloe, J., and Hasenstaub, A.R. (2019). Movement and  
773 VIP Interneuron Activation Differentially Modulate Encoding in Mouse Auditory  
774 Cortex. *ENeuro* **6**.
- 775 Bureau, I., Shepherd, G.M.G., and Svoboda, K. (2004). Precise Development of  
776 Functional and Anatomical Columns in the Neocortex. *Neuron* **42**, 789–801.
- 777 Butt, S.J.B., Fuccillo, M., Nery, S., Noctor, S., Kriegstein, A., Corbin, J.G., and  
778 Fishell, G. (2005). The Temporal and Spatial Origins of Cortical Interneurons  
779 Predict Their Physiological Subtype. *Neuron* **48**, 591–604.
- 780 Cao, Y., Roy, S., Sachdev, R.N.S., and Heck, D.H. (2012). Dynamic Correlation  
781 between Whisking and Breathing Rhythms in Mice. *J. Neurosci.* **32**, 1653–  
782 1659.
- 783 Cardin, J.A. (2019). Functional flexibility in cortical circuits. *Curr. Opin. Neurobiol.* **58**,  
784 175–180.
- 785 Che, A., Babij, R., Iannone, A.F., Fetcho, R.N., Ferrer, M., Liston, C., Fishell, G., and  
786 De Marco García, N.V. (2018). Layer I Interneurons Sharpen Sensory Maps  
787 during Neonatal Development. *Neuron* **99**, 98-116.e7.
- 788 Chiu, C.Q., Martenson, J.S., Yamazaki, M., Natsume, R., Sakimura, K., Tomita, S.,  
789 Tavalin, S.J., and Higley, M.J. (2018). Input-Specific NMDAR-Dependent  
790 Potentiation of Dendritic GABAergic Inhibition. *Neuron* **97**, 368-377.e3.
- 791 Clem, R.L., and Barth, A. (2006). Pathway-Specific Trafficking of Native AMPARs by  
792 In Vivo Experience. *Neuron* **49**, 663–670.
- 793 Clem, R.L., Celikel, T., and Barth, A.L. (2008). Ongoing in vivo experience triggers  
794 synaptic metaplasticity in the neocortex. *Science* **319**, 101–104.
- 795 Clement, E.A., Richard, A., Thwaites, M., Ailon, J., Peters, S., and Dickson, C.T.  
796 (2008). Cyclic and Sleep-Like Spontaneous Alternations of Brain State Under  
797 Urethane Anaesthesia. *PLOS ONE* **3**, e2004.
- 798 Dávid, C., Schleicher, A., Zuschratter, W., and Staiger, J.F. (2007). The innervation  
799 of parvalbumin-containing interneurons by VIP-immunopositive interneurons in  
800 the primary somatosensory cortex of the adult rat. *Eur. J. Neurosci.* **25**, 2329–  
801 2340.

- 802 De León Reyes, N.S., Mederos, S., Varela, I., Weiss, L.A., Perea, G., Galazo, M.J.,  
803 and Nieto, M. (2019). Transient callosal projections of L4 neurons are  
804 eliminated for the acquisition of local connectivity. *Nat. Commun.* *10*, 4549.
- 805 De Marco García, N.V., Priya, R., Tuncdemir, S.N., Fishell, G., and Karayannis, T.  
806 (2015). Sensory inputs control the integration of neurogliaform interneurons  
807 into cortical circuits. *Nat. Neurosci.* *18*, 393–401.
- 808 Demeulemeester, H., Vandesande, F., Orban, G.A., Brandon, C., and  
809 Vanderhaeghen, J.J. (1988). Heterogeneity of GABAergic cells in cat visual  
810 cortex. *J. Neurosci. Off. J. Soc. Neurosci.* *8*, 988–1000.
- 811 Dipoppa, M., Ranson, A., Krumin, M., Pachitariu, M., Carandini, M., and Harris, K.D.  
812 (2018). Vision and Locomotion Shape the Interactions between Neuron Types  
813 in Mouse Visual Cortex. *Neuron* *98*, 602-615.e8.
- 814 Erzurumlu, R.S., and Gaspar, P. (2012). Development and critical period plasticity of  
815 the barrel cortex: Barrel cortex plasticity. *Eur. J. Neurosci.* *35*, 1540–1553.
- 816 Frazer, S., Otomo, K., and Dayer, A. (2015). Early-life serotonin dysregulation affects  
817 the migration and positioning of cortical interneuron subtypes. *Transl.*  
818 *Psychiatry* *5*, e644.
- 819 Fu, Y., Tucciarone, J.M., Espinosa, J.S., Sheng, N., Darcy, D.P., Nicoll, R.A., Huang,  
820 Z.J., and Stryker, M.P. (2014). A cortical circuit for gain control by behavioral  
821 state. *Cell* *156*, 1139–1152.
- 822 Fu, Y., Kaneko, M., Tang, Y., Alvarez-Buylla, A., and Stryker, M.P. (2015). A cortical  
823 disinhibitory circuit for enhancing adult plasticity. *ELife* *4*, e05558.
- 824 Garcia-Junco-Clemente, P., Ikrar, T., Tring, E., Xu, X., Ringach, D.L., and  
825 Trachtenberg, J.T. (2017). An inhibitory pull–push circuit in frontal cortex. *Nat.*  
826 *Neurosci.* *20*, 389–392.
- 827 Garrett, M., Manavi, S., Roll, K., Ollerenshaw, D.R., Groblewski, P.A., Ponvert, N.D.,  
828 Kiggins, J.T., Casal, L., Mace, K., Williford, A., et al. (2020). Experience shapes  
829 activity dynamics and stimulus coding of VIP inhibitory cells. *ELife* *9*, e50340.
- 830 Goff, K.M., and Goldberg, E.M. (2019). Vasoactive intestinal peptide-expressing  
831 interneurons are impaired in a mouse model of Dravet syndrome. *ELife* *8*,  
832 e46846.
- 833 Gong, S., Zheng, C., Doughty, M.L., Losos, K., Didkovsky, N., Schambra, U.B.,  
834 Nowak, N.J., Joyner, A., Leblanc, G., Hatten, M.E., et al. (2003). A gene  
835 expression atlas of the central nervous system based on bacterial artificial  
836 chromosomes. *Nature* *425*, 917–925.
- 837 Harvey, N.L., Srinivasan, R.S., Dillard, M.E., Johnson, N.C., Witte, M.H., Boyd, K.,  
838 Sleeman, M.W., and Oliver, G. (2005). Lymphatic vascular defects promoted  
839 by Prox1 haploinsufficiency cause adult-onset obesity. *Nat. Genet.* *37*, 1072.
- 840 Hendry, S.H., Jones, E.G., DeFelipe, J., Schmechel, D., Brandon, C., and Emson,  
841 P.C. (1984). Neuropeptide-containing neurons of the cerebral cortex are also  
842 GABAergic. *Proc. Natl. Acad. Sci. U. S. A.* *81*, 6526–6530.
- 843 Hensch, T.K. (2005). Critical period plasticity in local cortical circuits. *Nat. Rev.*  
844 *Neurosci.* *6*, 877–888.
- 845 Hioki, H., Okamoto, S., Konno, M., Kameda, H., Sohn, J., Kuramoto, E., Fujiyama,  
846 F., and Kaneko, T. (2013). Cell Type-Specific Inhibitory Inputs to Dendritic and  
847 Somatic Compartments of Parvalbumin-Expressing Neocortical Interneuron. *J.*  
848 *Neurosci.* *33*, 544–555.
- 849 Itami, C., and Kimura, F. (2012). Developmental Switch in Spike Timing-Dependent  
850 Plasticity at Layers 4–2/3 in the Rodent Barrel Cortex. *J. Neurosci.* *32*, 15000–  
851 15011.
- 852 Iwano, T., Masuda, A., Kiyonari, H., Enomoto, H., and Matsuzaki, F. (2012). Prox1  
853 postmitotically defines dentate gyrus cells by specifying granule cell identity  
854 over CA3 pyramidal cell fate in the hippocampus. *Development* *139*, 3051–  
855 3062.



- 856 Karnani, M.M., Jackson, J., Ayzenshtat, I., Sichani, A.H., Manoocheri, K., Kim, S.,  
857 and Yuste, R. (2016). Opening Holes in the Blanket of Inhibition: Localized  
858 Lateral Disinhibition by VIP Interneurons. *J. Neurosci.* **36**, 3471–3480.
- 859 Kawaguchi, Y., and Kubota, Y. (1996). Physiological and morphological identification  
860 of somatostatin- or vasoactive intestinal polypeptide-containing cells among  
861 GABAergic cell subtypes in rat frontal cortex. *J. Neurosci. Off. J. Soc. Neurosci.*  
862 **16**, 2701–2715.
- 863 Keller, A.J., Dipoppa, M., Roth, M.M., Caudill, M.S., Ingrosso, A., Miller, K.D., and  
864 Scanziani, M. (2020). A Disinhibitory Circuit for Contextual Modulation in  
865 Primary Visual Cortex. *BioRxiv* 2020.01.31.929166.
- 866 Lee, S., Hjerling-Leffler, J., Zaghera, E., Fishell, G., and Rudy, B. (2010). The Largest  
867 Group of Superficial Neocortical GABAergic Interneurons Expresses Ionotropic  
868 Serotonin Receptors. *J. Neurosci.* **30**, 16796–16808.
- 869 Lee, S., Kruglikov, I., Huang, Z.J., Fishell, G., and Rudy, B. (2013). A disinhibitory  
870 circuit mediates motor integration in the somatosensory cortex. *Nat. Neurosci.*  
871 **16**, 1662–1670.
- 872 Letzkus, J.J., Wolff, S.B.E., and Lüthi, A. (2015). Disinhibition, a Circuit Mechanism  
873 for Associative Learning and Memory. *Neuron* **88**, 264–276.
- 874 Luhmann, H.J. (2017). Review of imaging network activities in developing rodent  
875 cerebral cortex in vivo. *Neurophotonics* **4**, 031202.
- 876 Lukacsovich, D., Winterer, J., Que, L., Luo, W., Lukacsovich, T., and Földy, C.  
877 (2019). Single-Cell RNA-Seq Reveals Developmental Origins and Ontogenetic  
878 Stability of Neurexin Alternative Splicing Profiles. *Cell Rep.* **27**, 3752-3759.e4.
- 879 Madisen, L., Mao, T., Koch, H., Zhuo, J., Berenyi, A., Fujisawa, S., Hsu, Y.-W.A.,  
880 Garcia Iii, A.J., Gu, X., Zanella, S., et al. (2012). A toolbox of Cre-dependent  
881 optogenetic transgenic mice for light-induced activation and silencing. *Nat.*  
882 *Neurosci.* **15**, 793–802.
- 883 Marques-Smith, A., Lyngholm, D., Kaufmann, A.-K., Stacey, J.A., Hoerder-  
884 Suabedissen, A., Becker, E.B.E., Wilson, M.C., Molnár, Z., and Butt, S.J.B.  
885 (2016). A Transient Translaminar GABAergic Interneuron Circuit Connects  
886 Thalamocortical Recipient Layers in Neonatal Somatosensory Cortex. *Neuron*  
887 **89**, 536–549.
- 888 McVea, D.A., Mohajerani, M.H., and Murphy, T.H. (2012). Voltage-Sensitive Dye  
889 Imaging Reveals Dynamic Spatiotemporal Properties of Cortical Activity after  
890 Spontaneous Muscle Twitches in the Newborn Rat. *J. Neurosci.* **32**, 10982–  
891 10994.
- 892 McVea, D.A., Murphy, T.H., and Mohajerani, M.H. (2017). Spontaneous activity  
893 synchronizes whisker-related sensorimotor networks prior to their maturation in  
894 the developing rat cortex. *BioRxiv* 176800.
- 895 Mégevand, P., Troncoso, E., Quairiaux, C., Muller, D., Michel, C.M., and Kiss, J.Z.  
896 (2009). Long-Term Plasticity in Mouse Sensorimotor Circuits after Rhythmic  
897 Whisker Stimulation. *J. Neurosci.* **29**, 5326–5335.
- 898 Millman, D.J., Ocker, G.K., Caldejon, S., Kato, I., Larkin, J.D., Lee, E.K., Luviano, J.,  
899 Nayan, C., Nguyen, T.V., North, K., et al. (2019). VIP interneurons selectively  
900 enhance weak but behaviorally-relevant stimuli. *BioRxiv* 858001.
- 901 Miyoshi, G., and Fishell, G. (2011). GABAergic Interneuron Lineages Selectively Sort  
902 into Specific Cortical Layers during Early Postnatal Development. *Cereb.*  
903 *Cortex* **21**, 845–852.
- 904 Miyoshi, G., Hjerling-Leffler, J., Karayannis, T., Sousa, V.H., Butt, S.J.B., Battiste, J.,  
905 Johnson, J.E., Machold, R.P., and Fishell, G. (2010). Genetic Fate Mapping  
906 Reveals That the Caudal Ganglionic Eminence Produces a Large and Diverse  
907 Population of Superficial Cortical Interneurons. *J. Neurosci.* **30**, 1582–1594.
- 908 Miyoshi, G., Young, A., Petros, T., Karayannis, T., McKenzie Chang, M., Lavado, A.,  
909 Iwano, T., Nakajima, M., Taniguchi, H., Huang, Z.J., et al. (2015). *Prox1*  
910 Regulates the Subtype-Specific Development of Caudal Ganglionic Eminence-

- 911 Derived GABAergic Cortical Interneurons. *J. Neurosci. Off. J. Soc. Neurosci.*  
912 *35*, 12869–12889.
- 913 Mossner, J.M., Batista-Brito, R., Pant, R., and Cardin, J.A. (2020). Developmental  
914 loss of MeCP2 from VIP interneurons impairs cortical function and behavior.  
915 *ELife* *9*, e55639.
- 916 Muñoz, W., Tremblay, R., Levenstein, D., and Rudy, B. (2017). Layer-specific  
917 modulation of neocortical dendritic inhibition during active wakefulness.  
918 *Science* *355*, 954–959.
- 919 Murthy, S., Niquille, M., Hurni, N., Limoni, G., Frazer, S., Chameau, P., van Hooft,  
920 J.A., Vitalis, T., and Dayer, A. (2014). Serotonin receptor 3A controls  
921 interneuron migration into the neocortex. *Nat. Commun.* *5*.
- 922 Oh, W.C., Lutz, S., Castillo, P.E., and Kwon, H.-B. (2016). De novo synaptogenesis  
923 induced by GABA in the developing mouse cortex. *Science* *353*, 1037–1040.
- 924 Pachitariu, M., Steinmetz, N., Kadir, S., Carandini, M., and Kenneth D., H. (2016).  
925 Kilosort: realtime spike-sorting for extracellular electrophysiology with hundreds  
926 of channels (*Neuroscience*).
- 927 Pakan, J.M., Lowe, S.C., Dylida, E., Keemink, S.W., Currie, S.P., Coutts, C.A., and  
928 Rochefort, N.L. (2016). Behavioral-state modulation of inhibition is context-  
929 dependent and cell type specific in mouse visual cortex. *ELife* *5*, e14985.
- 930 Paxinos, G., Halliday, G.M., Watson, C., Koutcherov, Y., and Wang, H. (2007). Atlas  
931 of the Developing Mouse Brain at E17. 5, P0 and (Academic press).
- 932 Petersen, C.C.H. (2019). Sensorimotor processing in the rodent barrel cortex. *Nat.*  
933 *Rev. Neurosci.* *20*, 533–546.
- 934 Petreanu, L., Mao, T., Sternson, S.M., and Svoboda, K. (2009). The subcellular  
935 organization of neocortical excitatory connections. *Nature* *457*, 1142–1145.
- 936 Pfeffer, C.K., Xue, M., He, M., Huang, Z.J., and Scanziani, M. (2013). Inhibition of  
937 Inhibition in Visual Cortex: The Logic of Connections Between Molecularly  
938 Distinct Interneurons. *Nat. Neurosci.* *16*, 1068–1076.
- 939 Pi, H.-J., Hangya, B., Kvitsiani, D., Sanders, J.I., Huang, Z.J., and Kepecs, A. (2013).  
940 Cortical interneurons that specialize in disinhibitory control. *Nature* *503*, 521–  
941 524.
- 942 Pregno, G., Frola, E., Graziano, S., Patrizi, A., Bussolino, F., Arese, M., and Sassoè-  
943 Pognetto, M. (2013). Differential regulation of neurexin at glutamatergic and  
944 GABAergic synapses. *Front. Cell. Neurosci.* *7*.
- 945 Prönneke, A., Scheuer, B., Wagener, R.J., Möck, M., Witte, M., and Staiger, J.F.  
946 (2015). Characterizing VIP Neurons in the Barrel Cortex of VIPcre/tdTomato  
947 Mice Reveals Layer-Specific Differences. *Cereb. Cortex N. Y. NY* *25*, 4854–  
948 4868.
- 949 Prönneke, A., Witte, M., Möck, M., and Staiger, J.F. (2018). Neuromodulation Leads  
950 to a Burst-Tonic Switch in a Subset of VIP Neurons in Mouse Primary  
951 Somatosensory (Barrel) Cortex. *Cereb. Cortex*.
- 952 Qiu, F., Mao, X., Liu, P., Wu, J., Zhang, Y., Sun, D., Zhu, Y., Gong, L., Shao, M.,  
953 Fan, K., et al. (2020). microRNA Deficiency in VIP+ Interneurons Leads to  
954 Cortical Circuit Dysfunction. *Cereb. Cortex* *30*, 2229–2249.
- 955 Rossant, C., Kadir, S.N., Goodman, D.F.M., Schulman, J., Hunter, M.L.D., Saleem,  
956 A.B., Grosmark, A., Belluscio, M., Denfield, G.H., Ecker, A.S., et al. (2016).  
957 Spike sorting for large, dense electrode arrays. *Nat. Neurosci.* *19*, 634–641.
- 958 Rubin, A.N., and Kessaris, N. (2013). PROX1: a lineage tracer for cortical  
959 interneurons originating in the lateral/caudal ganglionic eminence and preoptic  
960 area. *PloS One* *8*, e77339.
- 961 Rudy, B., Fishell, G., Lee, S., and Hjerling-Leffler, J. (2011). Three Groups of  
962 Interneurons Account for Nearly 100% of Neocortical GABAergic Neurons.  
963 *Dev. Neurobiol.* *71*, 45–61.

- 964 Sachidhanandam, S., Sermet, B.S., and Petersen, C.C.H. (2016). Parvalbumin-  
965 Expressing GABAergic Neurons in Mouse Barrel Cortex Contribute to Gating a  
966 Goal-Directed Sensorimotor Transformation. *Cell Rep.* 15, 700–706.
- 967 Schindelin, J., Arganda-Carreras, I., Frise, E., Kaynig, V., Longair, M., Pietzsch, T.,  
968 Preibisch, S., Rueden, C., Saalfeld, S., Schmid, B., et al. (2012). Fiji: an open-  
969 source platform for biological-image analysis. *Nat. Methods* 9, 676–682.
- 970 Shepherd, G.M.G., Pologruto, T.A., and Svoboda, K. (2003). Circuit Analysis of  
971 Experience-Dependent Plasticity in the Developing Rat Barrel Cortex. *Neuron*  
972 38, 277–289.
- 973 Staiger, J.F., Masannek, C., Schleicher, A., and Zuschratter, W. (2004). Calbindin-  
974 containing interneurons are a target for VIP-immunoreactive synapses in rat  
975 primary somatosensory cortex. *J. Comp. Neurol.* 468, 179–189.
- 976 Suter, B.A., and Shepherd, G.M.G. (2015). Reciprocal Interareal Connections to  
977 Corticospinal Neurons in Mouse M1 and S2. *J. Neurosci.* 35, 2959–2974.
- 978 Taniguchi, H., He, M., Wu, P., Kim, S., Paik, R., Sugino, K., Kvitsani, D., Fu, Y., Lu,  
979 J., Lin, Y., et al. (2011). A Resource of Cre Driver Lines for Genetic Targeting  
980 of GABAergic Neurons in Cerebral Cortex. *Neuron* 71, 995–1013.
- 981 Tuncdemir, S.N., Wamsley, B., Stam, F.J., Osakada, F., Goulding, M., Callaway,  
982 E.M., Rudy, B., and Fishell, G. (2016). Early Somatostatin Interneuron  
983 Connectivity Mediates the Maturation of Deep Layer Cortical Circuits. *Neuron*  
984 89, 521–535.
- 985 Wall, N.R., De La Parra, M., Sorokin, J.M., Taniguchi, H., Huang, Z.J., and Callaway,  
986 E.M. (2016). Brain-Wide Maps of Synaptic Input to Cortical Interneurons. *J.*  
987 *Neurosci. Off. J. Soc. Neurosci.* 36, 4000–4009.
- 988 Weiler, S., Bauer, J., Hübener, M., Bonhoeffer, T., Rose, T., and Scheuss, V. (2018).  
989 High-yield in vitro recordings from neurons functionally characterized in vivo.  
990 *Nat. Protoc.* 13, 1275–1293.
- 991 Wen, J.A., and Barth, A.L. (2011). Input-specific critical periods for experience-  
992 dependent plasticity in layer 2/3 pyramidal neurons. *J. Neurosci. Off. J. Soc.*  
993 *Neurosci.* 31, 4456–4465.
- 994 Wester, J.C., Mahadevan, V., Rhodes, C.T., Calvigioni, D., Venkatesh, S., Maric, D.,  
995 Hunt, S., Yuan, X., Zhang, Y., Petros, T.J., et al. (2019). Neocortical Projection  
996 Neurons Instruct Inhibitory Interneuron Circuit Development in a Lineage-  
997 Dependent Manner. *Neuron*.
- 998 Williams, L.E., and Holtmaat, A. (2019). Higher-Order Thalamocortical Inputs Gate  
999 Synaptic Long-Term Potentiation via Disinhibition. *Neuron* 101, 91-102.e4.
- 1000 Xiao, D., Vanni, M.P., Mitelut, C.C., Chan, A.W., LeDue, J.M., Xie, Y., Chen, A.C.,  
1001 Swindale, N.V., and Murphy, T.H. (2017). Mapping cortical mesoscopic  
1002 networks of single spiking cortical or sub-cortical neurons. *ELife* 6, e19976.
- 1003 Xu, X., Roby, K.D., and Callaway, E.M. (2010). Immunochemical characterization of  
1004 inhibitory mouse cortical neurons: Three chemically distinct classes of inhibitory  
1005 cells. *J. Comp. Neurol.* 518, 389–404.
- 1006 Yamawaki, N., and Shepherd, G.M.G. (2015). Synaptic Circuit Organization of Motor  
1007 Corticothalamic Neurons. *J. Neurosci.* 35, 2293–2307.
- 1008 Yu, J., Hu, H., Agmon, A., and Svoboda, K. (2019). Recruitment of GABAergic  
1009 Interneurons in the Barrel Cortex during Active Tactile Behavior. *Neuron*.
- 1010 Zhang, S., Xu, M., Kamigaki, T., Hoang Do, J.P., Chang, W.-C., Jenvay, S.,  
1011 Miyamichi, K., Luo, L., and Dan, Y. (2014). Selective attention. Long-range and  
1012 local circuits for top-down modulation of visual cortex processing. *Science* 345,  
1013 660–665.
- 1014 Zhou, X., Rickmann, M., Hafner, G., and Staiger, J.F. (2017). Subcellular Targeting  
1015 of VIP Boutons in Mouse Barrel Cortex is Layer-Dependent and not Restricted  
1016 to Interneurons. *Cereb. Cortex* 27, 5353–5368.
- 1017
